# Supplementary material for: Taxonomic annotation errors incorrectly assign the family Pseudoalteromonadaceae to the order Vibrionales in Greengenes: implications for microbial community assessments
Source: PeerJ. 2018 Jul 10;6:e5248. doi: 10.7717/peerj.5248 (PMC6044269; doi:10.7717/peerj.5248)
Supplement: Supplemental Information 1 — Table 1 provides a summary of each Greengenes representative sequence and provides the taxonomic identities for search using NCBI, RDP, and SILVA. The other tabs indicate the raw data search results that are summarized in the first tab. [file peerj-06-5248-s001.xlsx]

## Sheet: Results_Summary
*	Greengenes ID	Greengenes Assigned Taxonomy	RDP seqmatch results (Type Strains)	NCBI Taxonomy (16S rRNA Database)	SILVA ref NR (Aligner)
	8906	Bacteria; p_Proteobacteria; c_Gammaproteobacteria; o_Vibrionales; f_Pseudoalteromonadaceae; g_Pseudoalteromonas; s_	Alteromonadales Pseudoalteromonadaceae	Pseudoalteromonas distincta	Alteromonadales Pseudoalteromonadaceae
	8958	Bacteria; p_Proteobacteria; c_Gammaproteobacteria; o_Vibrionales; f_Pseudoalteromonadaceae; g_Pseudoalteromonas; s_	Alteromonadales Pseudoalteromonadaceae	Pseudoalteromonas denitrificans	Alteromonadales Pseudoalteromonadaceae
	8965	Bacteria; p_Proteobacteria; c_Gammaproteobacteria; o_Vibrionales; f_Pseudoalteromonadaceae; g_Pseudoalteromonas; s_	Alteromonadales Pseudoalteromonadaceae	Pseudoalteromonas ulvae	Alteromonadales Pseudoalteromonadaceae
	8966	Bacteria; p_Proteobacteria; c_Gammaproteobacteria; o_Vibrionales; f_Pseudoalteromonadaceae; g_Pseudoalteromonas; s_piscicida	Alteromonadales Pseudoalteromonadaceae	Pseudoalteromonas piscicida	Alteromonadales Pseudoalteromonadaceae
	9314	Bacteria; p_Proteobacteria; c_Gammaproteobacteria; o_Vibrionales; f_Pseudoalteromonadaceae; g_; s_	Vibrionales Vibrionaceae	Vibrio diazotrophicus	Vibrionales Vibrionaceae
	19398	Bacteria; p_Proteobacteria; c_Gammaproteobacteria; o_Vibrionales; f_Pseudoalteromonadaceae; g_Pseudoalteromonas; s_	Alteromonadales Pseudoalteromonadaceae	Pseudoalteromonas agarivorans	Alteromonadales Pseudoalteromonadaceae
	21967	Bacteria; p_Proteobacteria; c_Gammaproteobacteria; o_Vibrionales; f_Pseudoalteromonadaceae; g_; s_	Vibrionales Vibrionaceae	Vibrio natriegens	Vibrionales Vibrionaceae
	36441	Bacteria; p_Proteobacteria; c_Gammaproteobacteria; o_Vibrionales; f_Pseudoalteromonadaceae; g_Pseudoalteromonas; s_	Alteromonadales Pseudoalteromonadaceae	Pseudoalteromonas carrageenovora	Alteromonadales Pseudoalteromonadaceae
	36812	Bacteria; p_Proteobacteria; c_Gammaproteobacteria; o_Vibrionales; f_Pseudoalteromonadaceae; g_Pseudoalteromonas; s_	Alteromonadales Pseudoalteromonadaceae	Pseudoalteromonas tetraodonis	Alteromonadales Pseudoalteromonadaceae
	40554	Bacteria; p_Proteobacteria; c_Gammaproteobacteria; o_Vibrionales; f_Pseudoalteromonadaceae; g_Pseudoalteromonas; s_	Alteromonadales Pseudoalteromonadaceae	Pseudoalteromonas aliena	Alteromonadales Pseudoalteromonadaceae
	43095	Bacteria; p_Proteobacteria; c_Gammaproteobacteria; o_Vibrionales; f_Pseudoalteromonadaceae; g_Pseudoalteromonas; s_	Alteromonadales Pseudoalteromonadaceae	Pseudoalteromonas carrageenovora	Alteromonadales Pseudoalteromonadaceae
	73464	Bacteria; p_Proteobacteria; c_Gammaproteobacteria; o_Vibrionales; f_Pseudoalteromonadaceae; g_Pseudoalteromonas; s_	Alteromonadales Pseudoalteromonadaceae	Pseudoalteromonas spiralis	Alteromonadales Pseudoalteromonadaceae
	79171	Bacteria; p_Proteobacteria; c_Gammaproteobacteria; o_Vibrionales; f_Pseudoalteromonadaceae; g_Pseudoalteromonas; s_	Alteromonadales Pseudoalteromonadaceae	Pseudoalteromonas phenolica	Alteromonadales Pseudoalteromonadaceae
	83123	Bacteria; p_Proteobacteria; c_Gammaproteobacteria; o_Vibrionales; f_Pseudoalteromonadaceae; g_Pseudoalteromonas; s_	Alteromonadales Pseudoalteromonadaceae	Pseudoalteromonas arctica	Alteromonadales Pseudoalteromonadaceae
	84384	Bacteria; p_Proteobacteria; c_Gammaproteobacteria; o_Vibrionales; f_Pseudoalteromonadaceae; g_Pseudoalteromonas; s_	Alteromonadales Pseudoalteromonadaceae	Pseudoalteromonas elyakovii	Alteromonadales Pseudoalteromonadaceae
	84701	Bacteria; p_Proteobacteria; c_Gammaproteobacteria; o_Vibrionales; f_Pseudoalteromonadaceae; g_Pseudoalteromonas; s_	Alteromonadales Pseudoalteromonadaceae	Pseudoalteromonas tetraodonis	Alteromonadales Pseudoalteromonadaceae
	91378	Bacteria; p_Proteobacteria; c_Gammaproteobacteria; o_Vibrionales; f_Pseudoalteromonadaceae; g_; s_	Vibrionales Vibrionaceae	Vibrio cholerae	Vibrionales Vibrionaceae
	91529	Bacteria; p_Proteobacteria; c_Gammaproteobacteria; o_Vibrionales; f_Pseudoalteromonadaceae; g_; s_	Vibrionales Vibrionaceae	Vibrio proteolyticus	Vibrionales Vibrionaceae
	100142	Bacteria; p_Proteobacteria; c_Gammaproteobacteria; o_Vibrionales; f_Pseudoalteromonadaceae; g_Pseudoalteromonas; s_	Alteromonadales Pseudoalteromonadaceae	Pseudoalteromonas antarctica	Alteromonadales Pseudoalteromonadaceae
	100722	Bacteria; p_Proteobacteria; c_Gammaproteobacteria; o_Vibrionales; f_Pseudoalteromonadaceae; g_; s_	Vibrionales Vibrionaceae	Vibrio owensii	Vibrionales Vibrionaceae
	107552	Bacteria; p_Proteobacteria; c_Gammaproteobacteria; o_Vibrionales; f_Pseudoalteromonadaceae; g_Pseudoalteromonas; s_	Alteromonadales Pseudoalteromonadaceae	Pseudoalteromonas carrageenovora	Alteromonadales Pseudoalteromonadaceae
	108405	Bacteria; p_Proteobacteria; c_Gammaproteobacteria; o_Vibrionales; f_Pseudoalteromonadaceae; g_; s_	Vibrionales Vibrionaceae	Vibrio alginolyticus	Vibrionales Vibrionaceae
	112879	Bacteria; p_Proteobacteria; c_Gammaproteobacteria; o_Vibrionales; f_Pseudoalteromonadaceae; g_Pseudoalteromonas; s_	Alteromonadales Pseudoalteromonadaceae	Pseudoalteromonas arctica	Alteromonadales Pseudoalteromonadaceae
	134668	Bacteria; p_Proteobacteria; c_Gammaproteobacteria; o_Vibrionales; f_Pseudoalteromonadaceae; g_Pseudoalteromonas; s_	Alteromonadales Pseudoalteromonadaceae	Pseudoalteromonas spongiae	Alteromonadales Pseudoalteromonadaceae
	136178	Bacteria; p_Proteobacteria; c_Gammaproteobacteria; o_Vibrionales; f_Pseudoalteromonadaceae; g_; s_	Vibrionales Vibrionaceae	Vibrio crassostreae	Vibrionales Vibrionaceae
	140774	Bacteria; p_Proteobacteria; c_Gammaproteobacteria; o_Vibrionales; f_Pseudoalteromonadaceae; g_Pseudoalteromonas; s_luteoviolacea	Alteromonadales Pseudoalteromonadaceae	Pseudoalteromonas luteoviolacea	Alteromonadales Pseudoalteromonadaceae
	140783	Bacteria; p_Proteobacteria; c_Gammaproteobacteria; o_Vibrionales; f_Pseudoalteromonadaceae; g_Pseudoalteromonas; s_	Alteromonadales Pseudoalteromonadaceae	Pseudoalteromonas arctica	Alteromonadales Pseudoalteromonadaceae
	140786	Bacteria; p_Proteobacteria; c_Gammaproteobacteria; o_Vibrionales; f_Pseudoalteromonadaceae; g_Pseudoalteromonas; s_	Alteromonadales Pseudoalteromonadaceae	Pseudoalteromonas agarivorans	Alteromonadales Pseudoalteromonadaceae
	140787	Bacteria; p_Proteobacteria; c_Gammaproteobacteria; o_Vibrionales; f_Pseudoalteromonadaceae; g_Pseudoalteromonas; s_	Alteromonadales Pseudoalteromonadaceae	Pseudoalteromonas arctica	Alteromonadales Pseudoalteromonadaceae
	140803	Bacteria; p_Proteobacteria; c_Gammaproteobacteria; o_Vibrionales; f_Pseudoalteromonadaceae; g_Pseudoalteromonas; s_	Alteromonadales Pseudoalteromonadaceae	Pseudoalteromonas arctica	Alteromonadales Pseudoalteromonadaceae
	140823	Bacteria; p_Proteobacteria; c_Gammaproteobacteria; o_Vibrionales; f_Pseudoalteromonadaceae; g_Pseudoalteromonas; s_	Alteromonadales Pseudoalteromonadaceae	Pseudoalteromonas arctica	Alteromonadales Pseudoalteromonadaceae
	140829	Bacteria; p_Proteobacteria; c_Gammaproteobacteria; o_Vibrionales; f_Pseudoalteromonadaceae; g_Pseudoalteromonas; s_	Alteromonadales Pseudoalteromonadaceae	Pseudoalteromonas arctica	Alteromonadales Pseudoalteromonadaceae
	140837	Bacteria; p_Proteobacteria; c_Gammaproteobacteria; o_Vibrionales; f_Pseudoalteromonadaceae; g_Pseudoalteromonas; s_	Alteromonadales Pseudoalteromonadaceae	Pseudoalteromonas antarctica	Alteromonadales Pseudoalteromonadaceae
	140838	Bacteria; p_Proteobacteria; c_Gammaproteobacteria; o_Vibrionales; f_Pseudoalteromonadaceae; g_Pseudoalteromonas; s_	Alteromonadales Pseudoalteromonadaceae	Pseudoalteromonas lipolytica	Alteromonadales Pseudoalteromonadaceae
	140854	Bacteria; p_Proteobacteria; c_Gammaproteobacteria; o_Vibrionales; f_Pseudoalteromonadaceae; g_Pseudoalteromonas; s_	Alteromonadales Pseudoalteromonadaceae	Pseudoalteromonas tetraodonis	Alteromonadales Pseudoalteromonadaceae
	140860	Bacteria; p_Proteobacteria; c_Gammaproteobacteria; o_Vibrionales; f_Pseudoalteromonadaceae; g_Pseudoalteromonas; s_	Alteromonadales Pseudoalteromonadaceae	Pseudoalteromonas arctica	Alteromonadales Pseudoalteromonadaceae
	140870	Bacteria; p_Proteobacteria; c_Gammaproteobacteria; o_Vibrionales; f_Pseudoalteromonadaceae; g_Pseudoalteromonas; s_	Alteromonadales Pseudoalteromonadaceae	Pseudoalteromonas tetraodonis	Alteromonadales Pseudoalteromonadaceae
	140875	Bacteria; p_Proteobacteria; c_Gammaproteobacteria; o_Vibrionales; f_Pseudoalteromonadaceae; g_Pseudoalteromonas; s_	Alteromonadales Pseudoalteromonadaceae	Pseudoalteromonas agarivorans	Alteromonadales Pseudoalteromonadaceae
	140912	Bacteria; p_Proteobacteria; c_Gammaproteobacteria; o_Vibrionales; f_Pseudoalteromonadaceae; g_Pseudoalteromonas; s_	Alteromonadales Pseudoalteromonadaceae	Pseudoalteromonas agarivorans	Alteromonadales Pseudoalteromonadaceae
	140915	Bacteria; p_Proteobacteria; c_Gammaproteobacteria; o_Vibrionales; f_Pseudoalteromonadaceae; g_Pseudoalteromonas; s_	Alteromonadales Pseudoalteromonadaceae	Pseudoalteromonas donghaensis	Alteromonadales Pseudoalteromonadaceae
	140920	Bacteria; p_Proteobacteria; c_Gammaproteobacteria; o_Vibrionales; f_Pseudoalteromonadaceae; g_Pseudoalteromonas; s_	Alteromonadales Pseudoalteromonadaceae	Pseudoalteromonas arctica	Alteromonadales Pseudoalteromonadaceae
	140921	Bacteria; p_Proteobacteria; c_Gammaproteobacteria; o_Vibrionales; f_Pseudoalteromonadaceae; g_Pseudoalteromonas; s_	Alteromonadales Pseudoalteromonadaceae	Pseudoalteromonas donghaensis	Alteromonadales Pseudoalteromonadaceae
	140931	Bacteria; p_Proteobacteria; c_Gammaproteobacteria; o_Vibrionales; f_Pseudoalteromonadaceae; g_Pseudoalteromonas; s_	Alteromonadales Pseudoalteromonadaceae	Pseudoalteromonas lipolytica	Alteromonadales Pseudoalteromonadaceae
	140955	Bacteria; p_Proteobacteria; c_Gammaproteobacteria; o_Vibrionales; f_Pseudoalteromonadaceae; g_Pseudoalteromonas; s_	Alteromonadales Pseudoalteromonadaceae	Pseudoalteromonas tetraodonis	Alteromonadales Pseudoalteromonadaceae
	140967	Bacteria; p_Proteobacteria; c_Gammaproteobacteria; o_Vibrionales; f_Pseudoalteromonadaceae; g_Pseudoalteromonas; s_	Alteromonadales Pseudoalteromonadaceae	Pseudoalteromonas phenolica	Alteromonadales Pseudoalteromonadaceae
	140981	Bacteria; p_Proteobacteria; c_Gammaproteobacteria; o_Vibrionales; f_Pseudoalteromonadaceae; g_Pseudoalteromonas; s_	Alteromonadales Pseudoalteromonadaceae	Pseudoalteromonas lipolytica	Alteromonadales Pseudoalteromonadaceae
	145002	Bacteria; p_Proteobacteria; c_Gammaproteobacteria; o_Vibrionales; f_Pseudoalteromonadaceae; g_Pseudoalteromonas; s_	Alteromonadales Pseudoalteromonadaceae	Pseudoalteromonas denitrificans	Alteromonadales Pseudoalteromonadaceae
	153173	Bacteria; p_Proteobacteria; c_Gammaproteobacteria; o_Vibrionales; f_Pseudoalteromonadaceae; g_Pseudoalteromonas; s_	Alteromonadales Pseudoalteromonadaceae	Pseudoalteromonas lipolytica	Unknown
	156459	Bacteria; p_Proteobacteria; c_Gammaproteobacteria; o_Vibrionales; f_Pseudoalteromonadaceae; g_Pseudoalteromonas; s_tunicata	Alteromonadales Pseudoalteromonadaceae	Pseudoalteromonas amylolytica	Alteromonadales Pseudoalteromonadaceae
	158140	Bacteria; p_Proteobacteria; c_Gammaproteobacteria; o_Vibrionales; f_Pseudoalteromonadaceae; g_Pseudoalteromonas; s_	Alteromonadales Pseudoalteromonadaceae	Pseudoalteromonas haloplanktis	Alteromonadales Pseudoalteromonadaceae
	158267	Bacteria; p_Proteobacteria; c_Gammaproteobacteria; o_Vibrionales; f_Pseudoalteromonadaceae; g_Pseudoalteromonas; s_	Alteromonadales Pseudoalteromonadaceae	Pseudoalteromonas amylolytica	Alteromonadales Pseudoalteromonadaceae
	160246	Bacteria; p_Proteobacteria; c_Gammaproteobacteria; o_Vibrionales; f_Pseudoalteromonadaceae; g_; s_	Vibrionales Vibrionaceae	Vibrio alginolyticus	Vibrionales Vibrionaceae
	161179	Bacteria; p_Proteobacteria; c_Gammaproteobacteria; o_Vibrionales; f_Pseudoalteromonadaceae; g_Pseudoalteromonas; s_	Alteromonadales Pseudoalteromonadaceae	Pseudoalteromonas tetraodonis	Alteromonadales Pseudoalteromonadaceae
	162751	Bacteria; p_Proteobacteria; c_Gammaproteobacteria; o_Vibrionales; f_Pseudoalteromonadaceae; g_; s_	Vibrionales Vibrionaceae	Vibrio diazotrophicus	Vibrionales Vibrionaceae
	165795	Bacteria; p_Proteobacteria; c_Gammaproteobacteria; o_Vibrionales; f_Pseudoalteromonadaceae; g_; s_	Vibrionales Vibrionaceae	Vibrio diazotrophicus	Vibrionales Vibrionaceae
	169030	Bacteria; p_Proteobacteria; c_Gammaproteobacteria; o_Vibrionales; f_Pseudoalteromonadaceae; g_; s_	Vibrionales Vibrionaceae	Vibrio diazotrophicus	Vibrionales Vibrionaceae
	176420	Bacteria; p_Proteobacteria; c_Gammaproteobacteria; o_Vibrionales; f_Pseudoalteromonadaceae; g_; s_	Vibrionales Vibrionaceae	Vibrio atlanticus	Vibrionales Vibrionaceae
	200856	Bacteria; p_Proteobacteria; c_Gammaproteobacteria; o_Vibrionales; f_Pseudoalteromonadaceae; g_Pseudoalteromonas; s_	Alteromonadales Pseudoalteromonadaceae	Pseudoalteromonas profundi	Alteromonadales Pseudoalteromonadaceae
	202760	Bacteria; p_Proteobacteria; c_Gammaproteobacteria; o_Vibrionales; f_Pseudoalteromonadaceae; g_Pseudoalteromonas; s_ruthenica	Alteromonadales Pseudoalteromonadaceae	Pseudoalteromonas ruthenica	Alteromonadales Pseudoalteromonadaceae
	217623	Bacteria; p_Proteobacteria; c_Gammaproteobacteria; o_Vibrionales; f_Pseudoalteromonadaceae; g_; s_	Vibrionales Vibrionaceae	Vibrio alginolyticus	Vibrionales Vibrionaceae
	227555	Bacteria; p_Proteobacteria; c_Gammaproteobacteria; o_Vibrionales; f_Pseudoalteromonadaceae; g_; s_	Vibrionales Vibrionaceae	Vibrio tubiashii	Unknown
	227872	Bacteria; p_Proteobacteria; c_Gammaproteobacteria; o_Vibrionales; f_Pseudoalteromonadaceae; g_; s_	Vibrionales Vibrionaceae	Vibrio owensii	Unknown
	228084	Bacteria; p_Proteobacteria; c_Gammaproteobacteria; o_Vibrionales; f_Pseudoalteromonadaceae; g_; s_	Vibrionales Vibrionaceae	Vibrio jasicida	Vibrionales Vibrionaceae
	228157	Bacteria; p_Proteobacteria; c_Gammaproteobacteria; o_Vibrionales; f_Pseudoalteromonadaceae; g_; s_	Vibrionales Vibrionaceae	Vibrio owensii	Vibrionales Vibrionaceae
	228879	Bacteria; p_Proteobacteria; c_Gammaproteobacteria; o_Vibrionales; f_Pseudoalteromonadaceae; g_; s_	Vibrionales Vibrionaceae	Vibrio owensii	Vibrionales Vibrionaceae
	228974	Bacteria; p_Proteobacteria; c_Gammaproteobacteria; o_Vibrionales; f_Pseudoalteromonadaceae; g_Pseudoalteromonas; s_	Alteromonadales Pseudoalteromonadaceae	Pseudoalteromonas carrageenovora	Alteromonadales Pseudoalteromonadaceae
	229081	Bacteria; p_Proteobacteria; c_Gammaproteobacteria; o_Vibrionales; f_Pseudoalteromonadaceae; g_; s_	Vibrionales Vibrionaceae	Vibrio owensii	Vibrionales Vibrionaceae
	229982	Bacteria; p_Proteobacteria; c_Gammaproteobacteria; o_Vibrionales; f_Pseudoalteromonadaceae; g_; s_	Vibrionales Vibrionaceae	Vibrio owensii	Unknown
	230384	Bacteria; p_Proteobacteria; c_Gammaproteobacteria; o_Vibrionales; f_Pseudoalteromonadaceae; g_; s_	Vibrionales Vibrionaceae	Vibrio shilonii	Vibrionales Vibrionaceae
	230524	Bacteria; p_Proteobacteria; c_Gammaproteobacteria; o_Vibrionales; f_Pseudoalteromonadaceae; g_; s_	Vibrionales Vibrionaceae	Vibrio maritimus	Unknown
	231374	Bacteria; p_Proteobacteria; c_Gammaproteobacteria; o_Vibrionales; f_Pseudoalteromonadaceae; g_; s_	Vibrionales Vibrionaceae	Vibrio alginolyticus	Vibrionales Vibrionaceae
	231442	Bacteria; p_Proteobacteria; c_Gammaproteobacteria; o_Vibrionales; f_Pseudoalteromonadaceae; g_Pseudoalteromonas; s_	Alteromonadales Pseudoalteromonadaceae	Pseudoalteromonas carrageenovora	Alteromonadales Pseudoalteromonadaceae
	231832	Bacteria; p_Proteobacteria; c_Gammaproteobacteria; o_Vibrionales; f_Pseudoalteromonadaceae; g_Pseudoalteromonas; s_piscicida	Alteromonadales Pseudoalteromonadaceae	Pseudoalteromonas flavipulchra	Alteromonadales Pseudoalteromonadaceae
	233255	Bacteria; p_Proteobacteria; c_Gammaproteobacteria; o_Vibrionales; f_Pseudoalteromonadaceae; g_Pseudoalteromonas; s_	Alteromonadales Pseudoalteromonadaceae	Pseudoalteromonas carrageenovora	Alteromonadales Pseudoalteromonadaceae
	233383	Bacteria; p_Proteobacteria; c_Gammaproteobacteria; o_Vibrionales; f_Pseudoalteromonadaceae; g_; s_	Vibrionales Vibrionaceae	Vibrio owensii	Vibrionales Vibrionaceae
	233454	Bacteria; p_Proteobacteria; c_Gammaproteobacteria; o_Vibrionales; f_Pseudoalteromonadaceae; g_; s_	Vibrionales Vibrionaceae	Vibrio owensii	Vibrionales Vibrionaceae
	234491	Bacteria; p_Proteobacteria; c_Gammaproteobacteria; o_Vibrionales; f_Pseudoalteromonadaceae; g_; s_	Vibrionales Vibrionaceae	Vibrio owensii	Vibrionales Vibrionaceae
	234551	Bacteria; p_Proteobacteria; c_Gammaproteobacteria; o_Vibrionales; f_Pseudoalteromonadaceae; g_Pseudoalteromonas; s_	Alteromonadales Pseudoalteromonadaceae	Pseudoalteromonas shioyasakiensis	Alteromonadales Pseudoalteromonadaceae
	234709	Bacteria; p_Proteobacteria; c_Gammaproteobacteria; o_Vibrionales; f_Pseudoalteromonadaceae; g_; s_	Vibrionales Vibrionaceae	Vibrio fortis	Vibrionales Vibrionaceae
	235663	Bacteria; p_Proteobacteria; c_Gammaproteobacteria; o_Vibrionales; f_Pseudoalteromonadaceae; g_Pseudoalteromonas; s_	Alteromonadales Pseudoalteromonadaceae	Pseudoalteromonas tetraodonis	Alteromonadales Pseudoalteromonadaceae
	239572	Bacteria; p_Proteobacteria; c_Gammaproteobacteria; o_Vibrionales; f_Pseudoalteromonadaceae; g_Pseudoalteromonas; s_	Alteromonadales Pseudoalteromonadaceae	Pseudoalteromonas arctica	Alteromonadales Pseudoalteromonadaceae
	242480	Bacteria; p_Proteobacteria; c_Gammaproteobacteria; o_Vibrionales; f_Pseudoalteromonadaceae; g_Pseudoalteromonas; s_	Alteromonadales Pseudoalteromonadaceae	Pseudoalteromonas lipolytica	Alteromonadales Pseudoalteromonadaceae
	245029	Bacteria; p_Proteobacteria; c_Gammaproteobacteria; o_Vibrionales; f_Pseudoalteromonadaceae; g_; s_	Vibrionales Vibrionaceae	Pseudoalteromonas piscicida	Vibrionales Vibrionaceae
	245598	Bacteria; p_Proteobacteria; c_Gammaproteobacteria; o_Vibrionales; f_Pseudoalteromonadaceae; g_Pseudoalteromonas; s_piscicida	Alteromonadales Pseudoalteromonadaceae	Pseudoalteromonas piscicida	Alteromonadales Pseudoalteromonadaceae
	249895	Bacteria; p_Proteobacteria; c_Gammaproteobacteria; o_Vibrionales; f_Pseudoalteromonadaceae; g_Pseudoalteromonas; s_	Alteromonadales Pseudoalteromonadaceae	Pseudoalteromonas tetraodonis	Alteromonadales Pseudoalteromonadaceae
	251914	Bacteria; p_Proteobacteria; c_Gammaproteobacteria; o_Vibrionales; f_Pseudoalteromonadaceae; g_Pseudoalteromonas; s_	Alteromonadales Pseudoalteromonadaceae	Pseudoalteromonas carrageenovora	Alteromonadales Pseudoalteromonadaceae
	253428	Bacteria; p_Proteobacteria; c_Gammaproteobacteria; o_Vibrionales; f_Pseudoalteromonadaceae; g_Pseudoalteromonas; s_	Alteromonadales Pseudoalteromonadaceae	Pseudoalteromonas tetraodonis	Alteromonadales Pseudoalteromonadaceae
	261920	Bacteria; p_Proteobacteria; c_Gammaproteobacteria; o_Vibrionales; f_Pseudoalteromonadaceae; g_Pseudoalteromonas; s_ruthenica	Alteromonadales Pseudoalteromonadaceae	Pseudoalteromonas ruthenica	Alteromonadales Pseudoalteromonadaceae
	275521	Bacteria; p_Proteobacteria; c_Gammaproteobacteria; o_Vibrionales; f_Pseudoalteromonadaceae; g_Pseudoalteromonas; s_	Alteromonadales Pseudoalteromonadaceae	Pseudoalteromonas fenneropenaei	Alteromonadales Pseudoalteromonadaceae
	276493	Bacteria; p_Proteobacteria; c_Gammaproteobacteria; o_Vibrionales; f_Pseudoalteromonadaceae; g_; s_	Vibrionales Vibrionaceae	Vibrio harveyi	Vibrionales Vibrionaceae
	309143	Bacteria; p_Proteobacteria; c_Gammaproteobacteria; o_Vibrionales; f_Pseudoalteromonadaceae; g_Pseudoalteromonas; s_	Alteromonadales Pseudoalteromonadaceae	Pseudoalteromonas shioyasakiensis	Alteromonadales Pseudoalteromonadaceae
	309489	Bacteria; p_Proteobacteria; c_Gammaproteobacteria; o_Vibrionales; f_Pseudoalteromonadaceae; g_Pseudoalteromonas; s_	Alteromonadales Pseudoalteromonadaceae	Pseudoalteromonas shioyasakiensis	Alteromonadales Pseudoalteromonadaceae
	339560	Bacteria; p_Proteobacteria; c_Gammaproteobacteria; o_Vibrionales; f_Pseudoalteromonadaceae; g_; s_	Vibrionales Vibrionaceae	Vibrio anguillarum	Vibrionales Vibrionaceae
	346476	Bacteria; p_Proteobacteria; c_Gammaproteobacteria; o_Vibrionales; f_Pseudoalteromonadaceae; g_Pseudoalteromonas; s_	Alteromonadales Pseudoalteromonadaceae	Pseudoalteromonas aliena	Alteromonadales Pseudoalteromonadaceae
	419752	Bacteria; p_Proteobacteria; c_Gammaproteobacteria; o_Vibrionales; f_Pseudoalteromonadaceae; g_Pseudoalteromonas; s_	Alteromonadales Pseudoalteromonadaceae	Pseudoalteromonas arabiensis	Alteromonadales Pseudoalteromonadaceae
	519520	Bacteria; p_Proteobacteria; c_Gammaproteobacteria; o_Vibrionales; f_Pseudoalteromonadaceae; g_; s_	Vibrionales Vibrionaceae	Pseudoalteromonas luteoviolacea	Vibrionales Vibrionaceae
	526534	Bacteria; p_Proteobacteria; c_Gammaproteobacteria; o_Vibrionales; f_Pseudoalteromonadaceae; g_Pseudoalteromonas; s_	Alteromonadales Pseudoalteromonadaceae	Pseudoalteromonas amylolytica	Alteromonadales Pseudoalteromonadaceae
	532994	Bacteria; p_Proteobacteria; c_Gammaproteobacteria; o_Vibrionales; f_Pseudoalteromonadaceae; g_Pseudoalteromonas; s_luteoviolacea	Alteromonadales Pseudoalteromonadaceae	Pseudoalteromonas luteoviolacea	Alteromonadales Pseudoalteromonadaceae
	538892	Bacteria; p_Proteobacteria; c_Gammaproteobacteria; o_Vibrionales; f_Pseudoalteromonadaceae; g_; s_	Vibrionales Vibrionaceae	Vibrio hangzhouensis	Vibrionales Vibrionaceae
	540617	Bacteria; p_Proteobacteria; c_Gammaproteobacteria; o_Vibrionales; f_Pseudoalteromonadaceae; g_Pseudoalteromonas; s_	Alteromonadales Pseudoalteromonadaceae	Pseudoalteromonas agarivorans	Alteromonadales Pseudoalteromonadaceae
	542710	Bacteria; p_Proteobacteria; c_Gammaproteobacteria; o_Vibrionales; f_Pseudoalteromonadaceae; g_Pseudoalteromonas; s_	Alteromonadales Pseudoalteromonadaceae	Pseudoalteromonas gelatinilytica	Alteromonadales Pseudoalteromonadaceae
	555829	Bacteria; p_Proteobacteria; c_Gammaproteobacteria; o_Vibrionales; f_Pseudoalteromonadaceae; g_Pseudoalteromonas; s_	Alteromonadales Pseudoalteromonadaceae	Pseudoalteromonas shioyasakiensis	Alteromonadales Pseudoalteromonadaceae
	561165	Bacteria; p_Proteobacteria; c_Gammaproteobacteria; o_Vibrionales; f_Pseudoalteromonadaceae; g_Pseudoalteromonas; s_	Alteromonadales Pseudoalteromonadaceae	Colwellia sediminilitoris	Unknown
	561543	Bacteria; p_Proteobacteria; c_Gammaproteobacteria; o_Vibrionales; f_Pseudoalteromonadaceae; g_Pseudoalteromonas; s_	Alteromonadales Pseudoalteromonadaceae	Pseudoalteromonas donghaensi	Alteromonadales Pseudoalteromonadaceae
	562023	Bacteria; p_Proteobacteria; c_Gammaproteobacteria; o_Vibrionales; f_Pseudoalteromonadaceae; g_Pseudoalteromonas; s_	Alteromonadales Pseudoalteromonadaceae	Pseudoalteromonas tetraodonis	Alteromonadales Pseudoalteromonadaceae
	563900	Bacteria; p_Proteobacteria; c_Gammaproteobacteria; o_Vibrionales; f_Pseudoalteromonadaceae; g_; s_	Vibrionales Vibrionaceae	Vibrio inhibens	Vibrionales Vibrionaceae
	575667	Bacteria; p_Proteobacteria; c_Gammaproteobacteria; o_Vibrionales; f_Pseudoalteromonadaceae; g_Pseudoalteromonas; s_	Alteromonadales Pseudoalteromonadaceae	Pseudoalteromonas shioyasakiensis	Alteromonadales Pseudoalteromonadaceae
	578606	Bacteria; p_Proteobacteria; c_Gammaproteobacteria; o_Vibrionales; f_Pseudoalteromonadaceae; g_; s_	Vibrionales Vibrionaceae	Vibrio vulnificus	Vibrionales Vibrionaceae
	585394	Bacteria; p_Proteobacteria; c_Gammaproteobacteria; o_Vibrionales; f_Pseudoalteromonadaceae; g_Pseudoalteromonas; s_	Alteromonadales Pseudoalteromonadaceae	Pseudoalteromonas neustonica	Alteromonadales Pseudoalteromonadaceae
	586483	Bacteria; p_Proteobacteria; c_Gammaproteobacteria; o_Vibrionales; f_Pseudoalteromonadaceae; g_Pseudoalteromonas; s_	Alteromonadales Pseudoalteromonadaceae	Pseudoalteromonas xiamenensis	Alteromonadales Pseudoalteromonadaceae
	586746	Bacteria; p_Proteobacteria; c_Gammaproteobacteria; o_Vibrionales; f_Pseudoalteromonadaceae; g_Pseudoalteromonas; s_	Alteromonadales Pseudoalteromonadaceae	Pseudoalteromonas xiamenensis	Alteromonadales Pseudoalteromonadaceae
	591923	Bacteria; p_Proteobacteria; c_Gammaproteobacteria; o_Vibrionales; f_Pseudoalteromonadaceae; g_Pseudoalteromonas; s_	Alteromonadales Pseudoalteromonadaceae	Pseudoalteromonas arctica	Alteromonadales Pseudoalteromonadaceae
	707147	Bacteria; p_Proteobacteria; c_Gammaproteobacteria; o_Vibrionales; f_Pseudoalteromonadaceae; g_Pseudoalteromonas; s_	Alteromonadales Pseudoalteromonadaceae	Pseudoalteromonas profundi	Alteromonadales Pseudoalteromonadaceae
	721199	Bacteria; p_Proteobacteria; c_Gammaproteobacteria; o_Vibrionales; f_Pseudoalteromonadaceae; g_Pseudoalteromonas; s_ruthenica	Alteromonadales Pseudoalteromonadaceae	Pseudoalteromonas ruthenica	Alteromonadales Pseudoalteromonadaceae
	746138	Bacteria; p_Proteobacteria; c_Gammaproteobacteria; o_Vibrionales; f_Pseudoalteromonadaceae; g_Pseudoalteromonas; s_	Alteromonadales Pseudoalteromonadaceae	Pseudoalteromonas donghaensis	Alteromonadales Pseudoalteromonadaceae
	789777	Bacteria; p_Proteobacteria; c_Gammaproteobacteria; o_Vibrionales; f_Pseudoalteromonadaceae; g_Pseudoalteromonas; s_	Alteromonadales Pseudoalteromonadaceae	Pseudoalteromonas tetraodonis	Alteromonadales Pseudoalteromonadaceae
	797357	Bacteria; p_Proteobacteria; c_Gammaproteobacteria; o_Vibrionales; f_Pseudoalteromonadaceae; g_; s_	Vibrionales Vibrionaceae	Shewanella violacea	Vibrionales Vibrionaceae
	808031	Bacteria; p_Proteobacteria; c_Gammaproteobacteria; o_Vibrionales; f_Pseudoalteromonadaceae; g_Pseudoalteromonas; s_	Alteromonadales Pseudoalteromonadaceae	Pseudoalteromonas flavipulchra	Alteromonadales Pseudoalteromonadaceae
	820978	Bacteria; p_Proteobacteria; c_Gammaproteobacteria; o_Vibrionales; f_Pseudoalteromonadaceae; g_; s_	Vibrionales Vibrionaceae	Vibrio oceanisediminis	Vibrionales Vibrionaceae
	827726	Bacteria; p_Proteobacteria; c_Gammaproteobacteria; o_Vibrionales; f_Pseudoalteromonadaceae; g_Pseudoalteromonas; s_	Alteromonadales Pseudoalteromonadaceae	Pseudoalteromonas arctica	Alteromonadales Pseudoalteromonadaceae
	830290	Bacteria; p_Proteobacteria; c_Gammaproteobacteria; o_Vibrionales; f_Pseudoalteromonadaceae; g_Pseudoalteromonas; s_	Alteromonadales Pseudoalteromonadaceae	Pseudoalteromonas arctica	Alteromonadales Pseudoalteromonadaceae
	830696	Bacteria; p_Proteobacteria; c_Gammaproteobacteria; o_Vibrionales; f_Pseudoalteromonadaceae; g_Pseudoalteromonas; s_	Alteromonadales Pseudoalteromonadaceae	Pseudoalteromonas paragorgicola	Alteromonadales Pseudoalteromonadaceae
	833778	Bacteria; p_Proteobacteria; c_Gammaproteobacteria; o_Vibrionales; f_Pseudoalteromonadaceae; g_; s_	Vibrionales Vibrionaceae	Vibrio cholerae	Vibrionales Vibrionaceae
	834063	Bacteria; p_Proteobacteria; c_Gammaproteobacteria; o_Vibrionales; f_Pseudoalteromonadaceae; g_Pseudoalteromonas; s_	Alteromonadales Pseudoalteromonadaceae	Pseudoalteromonas arctica	Alteromonadales Pseudoalteromonadaceae
	834767	Bacteria; p_Proteobacteria; c_Gammaproteobacteria; o_Vibrionales; f_Pseudoalteromonadaceae; g_Pseudoalteromonas; s_	Alteromonadales Pseudoalteromonadaceae	Pseudoalteromonas arctica	Alteromonadales Pseudoalteromonadaceae
	836362	Bacteria; p_Proteobacteria; c_Gammaproteobacteria; o_Vibrionales; f_Pseudoalteromonadaceae; g_Pseudoalteromonas; s_	Alteromonadales Pseudoalteromonadaceae	Pseudoalteromonas carrageenovora	Alteromonadales Pseudoalteromonadaceae
	836450	Bacteria; p_Proteobacteria; c_Gammaproteobacteria; o_Vibrionales; f_Pseudoalteromonadaceae; g_Pseudoalteromonas; s_luteoviolacea	Alteromonadales Pseudoalteromonadaceae	Pseudoalteromonas luteoviolacea	Alteromonadales Pseudoalteromonadaceae
	837313	Bacteria; p_Proteobacteria; c_Gammaproteobacteria; o_Vibrionales; f_Pseudoalteromonadaceae; g_; s_	Vibrionales Vibrionaceae	Vibrio cholerae	Vibrionales Vibrionaceae
	837781	Bacteria; p_Proteobacteria; c_Gammaproteobacteria; o_Vibrionales; f_Pseudoalteromonadaceae; g_Pseudoalteromonas; s_	Alteromonadales Pseudoalteromonadaceae	Pseudoalteromonas arctica	Alteromonadales Pseudoalteromonadaceae
	838851	Bacteria; p_Proteobacteria; c_Gammaproteobacteria; o_Vibrionales; f_Pseudoalteromonadaceae; g_; s_	Vibrionales Vibrionaceae	Vibrio cholerae	Vibrionales Vibrionaceae
	935060	Bacteria; p_Proteobacteria; c_Gammaproteobacteria; o_Vibrionales; f_Pseudoalteromonadaceae; g_Pseudoalteromonas; s_	Alteromonadales Pseudoalteromonadaceae	Pseudoalteromonas carrageenovora	Alteromonadales Pseudoalteromonadaceae
	1055734	Bacteria; p_Proteobacteria; c_Gammaproteobacteria; o_Vibrionales; f_Pseudoalteromonadaceae; g_Pseudoalteromonas; s_	Alteromonadales Pseudoalteromonadaceae	Pseudoalteromonas elyakovii	Alteromonadales Pseudoalteromonadaceae
	1105883	Bacteria; p_Proteobacteria; c_Gammaproteobacteria; o_Vibrionales; f_Pseudoalteromonadaceae; g_Pseudoalteromonas; s_porphyrae	Alteromonadales Pseudoalteromonadaceae	Pseudoalteromonas prydzensis	Alteromonadales Pseudoalteromonadaceae
	1106577	Bacteria; p_Proteobacteria; c_Gammaproteobacteria; o_Vibrionales; f_Pseudoalteromonadaceae; g_Pseudoalteromonas; s_porphyrae	Alteromonadales Pseudoalteromonadaceae	Pseudoalteromonas prydzensis	Alteromonadales Pseudoalteromonadaceae
	1107917	Bacteria; p_Proteobacteria; c_Gammaproteobacteria; o_Vibrionales; f_Pseudoalteromonadaceae; g_; s_	Vibrionales Vibrionaceae	Vibrio rumoiensis	Vibrionales Vibrionaceae
	1108701	Bacteria; p_Proteobacteria; c_Gammaproteobacteria; o_Vibrionales; f_Pseudoalteromonadaceae; g_Pseudoalteromonas; s_piscicida	Alteromonadales Pseudoalteromonadaceae	Pseudoalteromonas peptidolytica	Alteromonadales Pseudoalteromonadaceae
	1115975	Bacteria; p_Proteobacteria; c_Gammaproteobacteria; o_Vibrionales; f_Pseudoalteromonadaceae; g_Vibrio; s_diazotrophicus	Vibrionales Vibrionaceae	Vibrio diazotrophicus	Vibrionales Vibrionaceae
	1142684	Bacteria; p_Proteobacteria; c_Gammaproteobacteria; o_Vibrionales; f_Pseudoalteromonadaceae; g_Pseudoalteromonas; s_	Alteromonadales Pseudoalteromonadaceae	Pseudoalteromonas spongiae	Alteromonadales Pseudoalteromonadaceae
	1145551	Bacteria; p_Proteobacteria; c_Gammaproteobacteria; o_Vibrionales; f_Pseudoalteromonadaceae; g_Pseudoalteromonas; s_	Alteromonadales Pseudoalteromonadaceae	Pseudoalteromonas elyakovii	Alteromonadales Pseudoalteromonadaceae
	1146540	Bacteria; p_Proteobacteria; c_Gammaproteobacteria; o_Vibrionales; f_Pseudoalteromonadaceae; g_Pseudoalteromonas; s_	Alteromonadales Pseudoalteromonadaceae	Pseudoalteromonas profundi	Alteromonadales Pseudoalteromonadaceae
	1931738	Bacteria; p_Proteobacteria; c_Gammaproteobacteria; o_Vibrionales; f_Pseudoalteromonadaceae; g_Pseudoalteromonas; s_	Alteromonadales Pseudoalteromonadaceae	Pseudoalteromonas shioyasakiensis	Alteromonadales Pseudoalteromonadaceae
	1931739	Bacteria; p_Proteobacteria; c_Gammaproteobacteria; o_Vibrionales; f_Pseudoalteromonadaceae; g_Pseudoalteromonas; s_	Alteromonadales Pseudoalteromonadaceae	Pseudoalteromonas profundi	Alteromonadales Pseudoalteromonadaceae
	2000912	Bacteria; p_Proteobacteria; c_Gammaproteobacteria; o_Vibrionales; f_Pseudoalteromonadaceae; g_; s_	Vibrionales Vibrionaceae	Vibrio diazotrophicus	Vibrionales Vibrionaceae
	2046416	Bacteria; p_Proteobacteria; c_Gammaproteobacteria; o_Vibrionales; f_Pseudoalteromonadaceae; g_Pseudoalteromonas; s_	Alteromonadales Pseudoalteromonadaceae	Pseudoalteromonas ruthenica	Alteromonadales Pseudoalteromonadaceae
	2373263	Bacteria; p_Proteobacteria; c_Gammaproteobacteria; o_Vibrionales; f_Pseudoalteromonadaceae; g_; s_	Vibrionales Vibrionaceae	Vibrio areninigrae	Vibrionales Vibrionaceae
	4270835	Bacteria; p_Proteobacteria; c_Gammaproteobacteria; o_Vibrionales; f_Pseudoalteromonadaceae; g_Vibrio; s_mimicus	Vibrionales Vibrionaceae	Vibrio cholerae	Vibrionales Vibrionaceae
	4302975	Bacteria; p_Proteobacteria; c_Gammaproteobacteria; o_Vibrionales; f_Pseudoalteromonadaceae; g_Pseudoalteromonas; s_	Alteromonadales Pseudoalteromonadaceae	Pseudoalteromonas tetraodonis	Alteromonadales Pseudoalteromonadaceae
	4313148	Bacteria; p_Proteobacteria; c_Gammaproteobacteria; o_Vibrionales; f_Pseudoalteromonadaceae; g_Pseudoalteromonas; s_	Alteromonadales Pseudoalteromonadaceae	Pseudoalteromonas piscicida	Alteromonadales Pseudoalteromonadaceae
	4315215	Bacteria; p_Proteobacteria; c_Gammaproteobacteria; o_Vibrionales; f_Pseudoalteromonadaceae; g_Pseudoalteromonas; s_porphyrae	Alteromonadales Pseudoalteromonadaceae	Pseudoalteromonas mariniglutinosa	Alteromonadales Pseudoalteromonadaceae
	4320372	Bacteria; p_Proteobacteria; c_Gammaproteobacteria; o_Vibrionales; f_Pseudoalteromonadaceae; g_Pseudoalteromonas; s_	Alteromonadales Pseudoalteromonadaceae	Pseudoalteromonas distincta	Alteromonadales Pseudoalteromonadaceae
	4353625	Bacteria; p_Proteobacteria; c_Gammaproteobacteria; o_Vibrionales; f_Pseudoalteromonadaceae; g_Pseudoalteromonas; s_	MIX OF BOTH; Alteromonales, Pseudo closest	Vibrio tasmaniensis	Alteromonadales Pseudoalteromonadaceae
	4356978	Bacteria; p_Proteobacteria; c_Gammaproteobacteria; o_Vibrionales; f_Pseudoalteromonadaceae; g_Pseudoalteromonas; s_	Alteromonadales Pseudoalteromonadaceae	Pseudoalteromonas arctica	Alteromonadales Pseudoalteromonadaceae
	4378322	Bacteria; p_Proteobacteria; c_Gammaproteobacteria; o_Vibrionales; f_Pseudoalteromonadaceae; g_Pseudoalteromonas; s_piscicida	Alteromonadales Pseudoalteromonadaceae	Pseudoalteromonas flavipulchra	Alteromonadales Pseudoalteromonadaceae
	4393352	Bacteria; p_Proteobacteria; c_Gammaproteobacteria; o_Vibrionales; f_Pseudoalteromonadaceae; g_Vibrio; s_cholerae	Vibrionales Vibrionaceae	Vibrio cholerae	Vibrionales Vibrionaceae
	4393354	Bacteria; p_Proteobacteria; c_Gammaproteobacteria; o_Vibrionales; f_Pseudoalteromonadaceae; g_Vibrio; s_harveyi	Vibrionales Vibrionaceae	Vibrio campbellii	Vibrionales Vibrionaceae
	4400016	Bacteria; p_Proteobacteria; c_Gammaproteobacteria; o_Vibrionales; f_Pseudoalteromonadaceae; g_Pseudoalteromonas; s_	Alteromonadales Pseudoalteromonadaceae	Pseudoalteromonas tetraodonis	Alteromonadales Pseudoalteromonadaceae
	4406967	Bacteria; p_Proteobacteria; c_Gammaproteobacteria; o_Vibrionales; f_Pseudoalteromonadaceae; g_Pseudoalteromonas; s_	Alteromonadales Pseudoalteromonadaceae	Pseudoalteromonas tetraodonis	Alteromonadales Pseudoalteromonadaceae
	4406968	Bacteria; p_Proteobacteria; c_Gammaproteobacteria; o_Vibrionales; f_Pseudoalteromonadaceae; g_Pseudoalteromonas; s_	Alteromonadales Pseudoalteromonadaceae	Pseudoalteromonas agarivorans	Alteromonadales Pseudoalteromonadaceae
	4407222	Bacteria; p_Proteobacteria; c_Gammaproteobacteria; o_Vibrionales; f_Pseudoalteromonadaceae; g_Pseudoalteromonas; s_	Alteromonadales Pseudoalteromonadaceae	Pseudoalteromonas byunsanensis	Alteromonadales Pseudoalteromonadaceae
	4419665	Bacteria; p_Proteobacteria; c_Gammaproteobacteria; o_Vibrionales; f_Pseudoalteromonadaceae; g_Pseudoalteromonas; s_	Alteromonadales Pseudoalteromonadaceae	Pseudoalteromonas agarivorans	Alteromonadales Pseudoalteromonadaceae
	4430475	Bacteria; p_Proteobacteria; c_Gammaproteobacteria; o_Vibrionales; f_Pseudoalteromonadaceae; g_Pseudoalteromonas; s_porphyrae	Alteromonadales Pseudoalteromonadaceae	Pseudoalteromonas mariniglutinosa	Alteromonadales Pseudoalteromonadaceae
	4441573	Bacteria; p_Proteobacteria; c_Gammaproteobacteria; o_Vibrionales; f_Pseudoalteromonadaceae; g_Pseudoalteromonas; s_	Alteromonadales Pseudoalteromonadaceae	Pseudoalteromonas arctica	Alteromonadales Pseudoalteromonadaceae
	4451971	Bacteria; p_Proteobacteria; c_Gammaproteobacteria; o_Vibrionales; f_Pseudoalteromonadaceae; g_; s_	Vibrionales Vibrionaceae	Vibrio diazotrophicus	Vibrionales Vibrionaceae
	4480124	Bacteria; p_Proteobacteria; c_Gammaproteobacteria; o_Vibrionales; f_Pseudoalteromonadaceae; g_Pseudoalteromonas; s_	Alteromonadales Pseudoalteromonadaceae	Pseudoalteromonas arctica	Alteromonadales Pseudoalteromonadaceae
*Color indicates agreement between NCBI, RDP, and SILVA
	Vibrionaceae
	Pseudoalteromonadaceae
	Ambiguous

## Sheet: NCBI_BLAST_RAW
	NCBI_Results
*	Greengenes ID	NCBI Taxonomy (16S rRNA)	Query Cover % BLAST	% ID BLAST	Accession NCBI BLAST Closet Match
	8906	Pseudoalteromonas distincta	99	98	NR_041711.1
	8958	Pseudoalteromonas denitrificans	100	100	NR_044866.1
	8965	Pseudoalteromonas ulvae	96	99	NR_025032.1
	8966	Pseudoalteromonas piscicida	100	98	NR_114190.1
	9314	Vibrio diazotrophicus	100	100	NR_118925.1
	19398	Pseudoalteromonas agarivorans	99	98	NR_025509.1
	21967	Vibrio natriegens	99	98	NR_026124.1
	36441	Pseudoalteromonas carrageenovora	100	98	NR_113605.1
	36812	Pseudoalteromonas tetraodonis	100	98	NR_114547.1
	40554	Pseudoalteromonas aliena	99	97	NR_025775.1
	43095	Pseudoalteromonas carrageenovora	100	93	NR_113605.1
	73464	Pseudoalteromonas spiralis	100	99	NR_114801.1
	79171	Pseudoalteromonas phenolica	100	100	NR_028809.1
	83123	Pseudoalteromonas arctica	98	99	NR_043959.1
	84384	Pseudoalteromonas elyakovii	99	93	NR_028722.1
	84701	Pseudoalteromonas tetraodonis	99	97	NR_114547.1
	91378	Vibrio cholerae	99	97	NR_115936.1
	91529	Vibrio proteolyticus	99	95	NR_118095.1
	100142	Pseudoalteromonas antarctica	100	98	NR_029317.1
	100722	Vibrio owensii	100	97	NR_117424.1
	107552	Pseudoalteromonas carrageenovora	98	98	NR_113605.1
	108405	Vibrio alginolyticus	99	98	NR_113781.1
	112879	Pseudoalteromonas arctica	100	96	NR_043959.1
	134668	Pseudoalteromonas spongiae	98	99	NR_043172.1
	136178	Vibrio crassostreae	99	97	NR_044078.1
	140774	Pseudoalteromonas luteoviolacea	93	97	NR_114237.1
	140783	Pseudoalteromonas arctica	100	95	NR_043959.1
	140786	Pseudoalteromonas agarivorans	99	98	NR_025509.1
	140787	Pseudoalteromonas arctica	100	95	NR_043959.1
	140803	Pseudoalteromonas arctica	100	95	NR_043959.1
	140823	Pseudoalteromonas arctica	100	97	NR_043959.1
	140829	Pseudoalteromonas arctica	100	96	NR_043959.1
	140837	Pseudoalteromonas antarctica	98	95	NR_029317.1
	140838	Pseudoalteromonas lipolytica	100	97	NR_116629.1
	140854	Pseudoalteromonas tetraodonis	99	96	NR_114547.1
	140860	Pseudoalteromonas arctica	100	98	NR_043959.1
	140870	Pseudoalteromonas tetraodonis	99	96	NR_114547.1
	140875	Pseudoalteromonas agarivorans	99	97	NR_025509.1
	140912	Pseudoalteromonas agarivorans	99	95	NR_025509.1
	140915	Pseudoalteromonas donghaensis	100	93	NR_104537.1
	140920	Pseudoalteromonas arctica	100	97	NR_043959.1
	140921	Pseudoalteromonas donghaensis	100	95	NR_104537.1
	140931	Pseudoalteromonas lipolytica	100	97	NR_116629.1
	140955	Pseudoalteromonas tetraodonis	99	99	NR_114547.1
	140967	Pseudoalteromonas phenolica	98	97	NR_113299.1
	140981	Pseudoalteromonas lipolytica	100	98	NR_116629.1
	145002	Pseudoalteromonas denitrificans	95	97	NR_044866.1
	153173	Pseudoalteromonas lipolytica	97	94	NR_116629.1
	156459	Pseudoalteromonas amylolytica	99	96	NR_149821.1
	158140	Pseudoalteromonas haloplanktis	100	97	NR_114052.1
	158267	Pseudoalteromonas amylolytica	100	97	NR_149821.1
	160246	Vibrio alginolyticus	100	99	NR_122059.1
	161179	Pseudoalteromonas tetraodonis	100	96	NR_041787.1
	162751	Vibrio diazotrophicus	99	96	NR_114217.1
	165795	Vibrio diazotrophicus	100	96	NR_114217.1
	169030	Vibrio diazotrophicus	100	95	NR_114217.1
	176420	Vibrio atlanticus	99	95	NR_116067.1
	200856	Pseudoalteromonas profundi	99	99	NR_152699.1
	202760	Pseudoalteromonas ruthenica	98	99	NR_025140.1
	217623	Vibrio alginolyticus	99	98	NR_122050.1
	227555	Vibrio tubiashii	100	93	NR_118093.1
	227872	Vibrio owensii	99	92	NR_117424.1
	228084	Vibrio jasicida	99	96	NR_113182.1
	228157	Vibrio owensii	99	98	NR_117424.1
	228879	Vibrio owensii	99	93	NR_117424.1
	228974	Pseudoalteromonas carrageenovora	100	93	NR_113605.1
	229081	Vibrio owensii	99	94	NR_117424.1
	229982	Vibrio owensii	99	90	NR_117424.1
	230384	Vibrio shilonii	100	92	NR_118242.1
	230524	Vibrio maritimus	100	92	NR_117551.1
	231374	Vibrio alginolyticus	100	95	NR_117895.1
	231442	Pseudoalteromonas carrageenovora	100	94	NR_113605.1
	231832	Pseudoalteromonas flavipulchra	100	97	NR_025126.1
	233255	Pseudoalteromonas carrageenovora	100	97	NR_113605.1
	233383	Vibrio owensii	99	97	NR_117424.1
	233454	Vibrio owensii	99	96	NR_117424.1
	234491	Vibrio owensii	99	97	NR_117424.1
	234551	Pseudoalteromonas shioyasakiensis	100	94	NR_125458.1
	234709	Vibrio fortis	100	93	NR_025575.1
	235663	Pseudoalteromonas tetraodonis	100	98	NR_041787.1
	239572	Pseudoalteromonas arctica	100	95	NR_043959.1
	242480	Pseudoalteromonas lipolytica	99	97	NR_116629.1
	245029	Pseudoalteromonas piscicida	99	96	NR_114190.1
	245598	Pseudoalteromonas piscicida	99	96	NR_114190.1
	249895	Pseudoalteromonas tetraodonis	99	98	NR_114547.1
	251914	Pseudoalteromonas carrageenovora	99	98	NR_113605.1
	253428	Pseudoalteromonas tetraodonis	100	93	NR_114547.1
	261920	Pseudoalteromonas ruthenica	100	99	NR_025140.1
	275521	Pseudoalteromonas fenneropenaei	99	98	NR_149790.1
	276493	Vibrio harveyi	99	97	NR_113784.1
	309143	Pseudoalteromonas shioyasakiensis	99	95	NR_125458.1
	309489	Pseudoalteromonas shioyasakiensis	99	99	NR_125458.1
	339560	Vibrio anguillarum	100	94	NR_113609.1
	346476	Pseudoalteromonas aliena	100	97	NR_025775.1
	419752	Pseudoalteromonas arabiensis	100	98	NR_113220.1
	519520	Pseudoalteromonas luteoviolacea	100	95	NR_114237.1
	526534	Pseudoalteromonas amylolytica	99	98	NR_149821.1
	532994	Pseudoalteromonas luteoviolacea	99	99	NR_026221.1
	538892	Vibrio hangzhouensis	97	95	NR_044396.1
	540617	Pseudoalteromonas agarivorans	99	98	NR_025509.1
	542710	Pseudoalteromonas gelatinilytica	100	96	NR_152003.1
	555829	Pseudoalteromonas shioyasakiensis	100	96	NR_125458.1
	561165	Colwellia sediminilitoris	99	91	NR_151990.1
	561543	Pseudoalteromonas donghaensi	99	92	NR_104537.1
	562023	Pseudoalteromonas tetraodonis	99	96	NR_114547.1
	563900	Vibrio inhibens	100	96	NR_134829.1
	575667	Pseudoalteromonas shioyasakiensis	100	95	NR_125458.1
	578606	Vibrio vulnificus	100	93	NR_036888.1
	585394	Pseudoalteromonas neustonica	100	95	NR_151996.1
	586483	Pseudoalteromonas xiamenensis	100	92	NR_043959.1
	586746	Pseudoalteromonas xiamenensis	100	99	NR_133827.1
	591923	Pseudoalteromonas arctica	100	97	NR_043959.1
	707147	Pseudoalteromonas profundi	99	93	NR_152699.1
	721199	Pseudoalteromonas ruthenica	100	99	NR_025140.1
	746138	Pseudoalteromonas donghaensis	99	89	NR_104537.1
	789777	Pseudoalteromonas tetraodonis	99	96	NR_114547.1
	797357	Shewanella violacea	99	91	NR_074924.1
	808031	Pseudoalteromonas flavipulchra	100	98	NR_025126.1
	820978	Vibrio oceanisediminis	100	98	NR_137371.1
	827726	Pseudoalteromonas arctica	100	94	NR_043959.1
	830290	Pseudoalteromonas arctica	100	97	NR_043959.1
	830696	Pseudoalteromonas paragorgicola	98	96	NR_025654.1
	833778	Vibrio cholerae	99	98	NR_044853.1
	834063	Pseudoalteromonas arctica	100	97	NR_043959.1
	834767	Pseudoalteromonas arctica	100	96	NR_043959.1
	836362	Pseudoalteromonas carrageenovora	77	96	NR_113605.1
	836450	Pseudoalteromonas luteoviolacea	100	99	NR_026221.1
	837313	Vibrio cholerae	99	97	NR_044853.1
	837781	Pseudoalteromonas arctica	100	97	NR_043959.1
	838851	Vibrio cholerae	99	96	NR_044853.1
	935060	Pseudoalteromonas carrageenovora	96	99	NR_113605.1
	1055734	Pseudoalteromonas elyakovii	100	98	NR_028722.1
	1105883	Pseudoalteromonas prydzensis	96	98	NR_044803.1
	1106577	Pseudoalteromonas prydzensis	97	96	NR_044803.1
	1107917	Vibrio rumoiensis	98	91	NR_024680.1
	1108701	Pseudoalteromonas peptidolytica	100	99	NR_113971.1
	1115975	Vibrio diazotrophicus	98	99	NR_114217.1
	1142684	Pseudoalteromonas spongiae	100	100	NR_043172.1
	1145551	Pseudoalteromonas elyakovii	99	96	NR_028722.1
	1146540	Pseudoalteromonas profundi	100	99	NR_152699.1
	1931738	Pseudoalteromonas shioyasakiensis	100	97	NR_125458.1
	1931739	Pseudoalteromonas profundi	97	97	NR_152699.1
	2000912	Vibrio diazotrophicus	98	99	NR_114217.1
	2046416	Pseudoalteromonas ruthenica	100	98	NR_025140.1
	2373263	Vibrio areninigrae	95	97	NR_044417.1
	4270835	Vibrio cholerae	99	98	NR_044853.1
	4302975	Pseudoalteromonas tetraodonis	99	97	NR_114547.1
	4313148	Pseudoalteromonas piscicida	98	98	NR_040946.1
	4315215	Pseudoalteromonas mariniglutinosa	99	96	NR_028992.1
	4320372	Pseudoalteromonas distincta	98	97	NR_041711.1
	4353625	Vibrio tasmaniensis	100	94	NR_036929.1
	4356978	Pseudoalteromonas arctica	100	97	NR_043959.1
	4378322	Pseudoalteromonas flavipulchra	100	98	NR_025126.1
	4393352	Vibrio cholerae	100	97	NR_115936.1
	4393354	Vibrio campbellii	99	95	NR_119050.1
	4400016	Pseudoalteromonas tetraodonis	99	96	NR_114547.1
	4406967	Pseudoalteromonas tetraodonis	100	98	NR_114547.1
	4406968	Pseudoalteromonas agarivorans	99	99	NR_025509.1
	4407222	Pseudoalteromonas byunsanensis	98	100	NR_043466.1
	4419665	Pseudoalteromonas agarivorans	99	98	NR_025509.1
	4430475	Pseudoalteromonas mariniglutinosa	95	99	NR_028992.1
	4441573	Pseudoalteromonas arctica	100	98	NR_043959.1
	4451971	Vibrio diazotrophicus	100	96	NR_114217.1
	4480124	Pseudoalteromonas arctica	100	91	NR_043959.1
*Color indicates agreement between NCBI, RDP, and SILVA
	Vibrionaceae
	Pseudoalteromonadaceae
	Ambiguous

## Sheet: RDP_SEQMATCH_RAW
	RDP_SEQMATCH_RESULTS
*	Greengenes ID	Sequence Name	Domain	Phylum	Class	Order	Family	Genus	S_ab score	Unique Common Oligomers
	8906	Pseudoalteromonas undina (T); NCIMB 2128T; X82140	Bacteria	Proteobacteria	Gammaproteobacteria	Alteromonadales	Pseudoalteromonadaceae	Pseudoalteromonas	0.907	1278
	8958	Pseudoalteromonas aurantia (T); ATCC 33046T; X82135	Bacteria	Proteobacteria	Gammaproteobacteria	Alteromonadales	Pseudoalteromonadaceae	Pseudoalteromonas	0.822	1349
	8965	Pseudoalteromonas aurantia (T); ATCC 33046T; X82135	Bacteria	Proteobacteria	Gammaproteobacteria	Alteromonadales	Pseudoalteromonadaceae	Pseudoalteromonas	0.788	1349
	8966	Pseudoalteromonas espejiana (T); NCIMB 2127T; X82143	Bacteria	Proteobacteria	Gammaproteobacteria	Alteromonadales	Pseudoalteromonadaceae	Pseudoalteromonas	0.868	1332
	9314	Vibrio vulnificus (T); ATCC 27562 T; X76333	Bacteria	Proteobacteria	Gammaproteobacteria	Vibrionales	Vibrionaceae	Vibrio	0.835	1438
	19398	Pseudoalteromonas undina (T); NCIMB 2128T; X82140	Bacteria	Proteobacteria	Gammaproteobacteria	Alteromonadales	Pseudoalteromonadaceae	Pseudoalteromonas	0.868	1278
	21967	Vibrio agarivorans (T); 289T, CECT 5085T; AJ310647	Bacteria	Proteobacteria	Gammaproteobacteria	Vibrionales	Vibrionaceae	Vibrio	0.828	1449
	36441	Pseudoalteromonas undina (T); NCIMB 2128T; X82140	Bacteria	Proteobacteria	Gammaproteobacteria	Alteromonadales	Pseudoalteromonadaceae	Pseudoalteromonas	0.867	1278
	36812	Pseudoalteromonas undina (T); NCIMB 2128T; X82140	Bacteria	Proteobacteria	Gammaproteobacteria	Alteromonadales	Pseudoalteromonadaceae	Pseudoalteromonas	0.886	1278
	40554	Pseudoalteromonas undina (T); NCIMB 2128T; X82140	Bacteria	Proteobacteria	Gammaproteobacteria	Alteromonadales	Pseudoalteromonadaceae	Pseudoalteromonas	0.904	1278
	43095	Pseudoalteromonas undina (T); NCIMB 2128T; X82140	Bacteria	Proteobacteria	Gammaproteobacteria	Alteromonadales	Pseudoalteromonadaceae	Pseudoalteromonas	0.696	1278
	73464	Pseudoalteromonas undina (T); NCIMB 2128T; X82140	Bacteria	Proteobacteria	Gammaproteobacteria	Alteromonadales	Pseudoalteromonadaceae	Pseudoalteromonas	0.884	1278
	79171	Pseudoalteromonas aurantia (T); ATCC 33046T; X82135	Bacteria	Proteobacteria	Gammaproteobacteria	Alteromonadales	Pseudoalteromonadaceae	Pseudoalteromonas	0.801	1349
	83123	Pseudoalteromonas undina (T); NCIMB 2128T; X82140	Bacteria	Proteobacteria	Gammaproteobacteria	Alteromonadales	Pseudoalteromonadaceae	Pseudoalteromonas	0.886	1278
	84384	Pseudoalteromonas undina (T); NCIMB 2128T; X82140	Bacteria	Proteobacteria	Gammaproteobacteria	Alteromonadales	Pseudoalteromonadaceae	Pseudoalteromonas	0.725	1278
	84701	Pseudoalteromonas undina (T); NCIMB 2128T; X82140	Bacteria	Proteobacteria	Gammaproteobacteria	Alteromonadales	Pseudoalteromonadaceae	Pseudoalteromonas	0.851	1278
	91378	Vibrio mimicus (T); ATCC 33653T; X74713	Bacteria	Proteobacteria	Gammaproteobacteria	Vibrionales	Vibrionaceae	Vibrio	0.872	1350
	91529	Vibrio vulnificus (T); ATCC 27562 T; X76333	Bacteria	Proteobacteria	Gammaproteobacteria	Vibrionales	Vibrionaceae	Vibrio	0.734	1438
	100142	Pseudoalteromonas undina (T); NCIMB 2128T; X82140	Bacteria	Proteobacteria	Gammaproteobacteria	Alteromonadales	Pseudoalteromonadaceae	Pseudoalteromonas	0.858	1278
	100722	Vibrio vulnificus (T); ATCC 27562 T; X76333	Bacteria	Proteobacteria	Gammaproteobacteria	Vibrionales	Vibrionaceae	Vibrio	0.873	1438
	107552	Pseudoalteromonas undina (T); NCIMB 2128T; X82140	Bacteria	Proteobacteria	Gammaproteobacteria	Alteromonadales	Pseudoalteromonadaceae	Pseudoalteromonas	0.912	1278
	108405	Vibrio tubiashii (T); ATCC 19109T; X74725	Bacteria	Proteobacteria	Gammaproteobacteria	Vibrionales	Vibrionaceae	Vibrio	0.85	1303
	112879	Pseudoalteromonas undina (T); NCIMB 2128T; X82140	Bacteria	Proteobacteria	Gammaproteobacteria	Alteromonadales	Pseudoalteromonadaceae	Pseudoalteromonas	0.752	1278
	134668	Pseudoalteromonas espejiana (T); NCIMB 2127T; X82143	Bacteria	Proteobacteria	Gammaproteobacteria	Alteromonadales	Pseudoalteromonadaceae	Pseudoalteromonas	0.855	1332
	136178	Vibrio lentus (T); 4OM4T, CECT 5110T, DSM 13757T; AJ278881	Bacteria	Proteobacteria	Gammaproteobacteria	Vibrionales	Vibrionaceae	Vibrio	0.89	1462
	140774	Pseudoalteromonas undina (T); NCIMB 2128T; X82140	Bacteria	Proteobacteria	Gammaproteobacteria	Alteromonadales	Pseudoalteromonadaceae	Pseudoalteromonas	0.732	1278
	140783	Pseudoalteromonas undina (T); NCIMB 2128T; X82140	Bacteria	Proteobacteria	Gammaproteobacteria	Alteromonadales	Pseudoalteromonadaceae	Pseudoalteromonas	0.793	1278
	140786	Pseudoalteromonas undina (T); NCIMB 2128T; X82140	Bacteria	Proteobacteria	Gammaproteobacteria	Alteromonadales	Pseudoalteromonadaceae	Pseudoalteromonas	0.888	1278
	140787	Pseudoalteromonas undina (T); NCIMB 2128T; X82140	Bacteria	Proteobacteria	Gammaproteobacteria	Alteromonadales	Pseudoalteromonadaceae	Pseudoalteromonas	0.792	1278
	140803	Pseudoalteromonas undina (T); NCIMB 2128T; X82140	Bacteria	Proteobacteria	Gammaproteobacteria	Alteromonadales	Pseudoalteromonadaceae	Pseudoalteromonas	0.778	1278
	140823	Pseudoalteromonas undina (T); NCIMB 2128T; X82140	Bacteria	Proteobacteria	Gammaproteobacteria	Alteromonadales	Pseudoalteromonadaceae	Pseudoalteromonas	0.918	1278
	140829	Pseudoalteromonas undina (T); NCIMB 2128T; X82140	Bacteria	Proteobacteria	Gammaproteobacteria	Alteromonadales	Pseudoalteromonadaceae	Pseudoalteromonas	0.817	1278
	140837	Pseudoalteromonas undina (T); NCIMB 2128T; X82140	Bacteria	Proteobacteria	Gammaproteobacteria	Alteromonadales	Pseudoalteromonadaceae	Pseudoalteromonas	0.754	1278
	140838	Pseudoalteromonas undina (T); NCIMB 2128T; X82140	Bacteria	Proteobacteria	Gammaproteobacteria	Alteromonadales	Pseudoalteromonadaceae	Pseudoalteromonas	0.772	1278
	140854	Pseudoalteromonas undina (T); NCIMB 2128T; X82140	Bacteria	Proteobacteria	Gammaproteobacteria	Alteromonadales	Pseudoalteromonadaceae	Pseudoalteromonas	0.862	1278
	140860	Pseudoalteromonas undina (T); NCIMB 2128T; X82140	Bacteria	Proteobacteria	Gammaproteobacteria	Alteromonadales	Pseudoalteromonadaceae	Pseudoalteromonas	0.874	1278
	140870	Pseudoalteromonas undina (T); NCIMB 2128T; X82140	Bacteria	Proteobacteria	Gammaproteobacteria	Alteromonadales	Pseudoalteromonadaceae	Pseudoalteromonas	0.851	1278
	140875	Pseudoalteromonas undina (T); NCIMB 2128T; X82140	Bacteria	Proteobacteria	Gammaproteobacteria	Alteromonadales	Pseudoalteromonadaceae	Pseudoalteromonas	0.849	1278
	140912	Pseudoalteromonas undina (T); NCIMB 2128T; X82140	Bacteria	Proteobacteria	Gammaproteobacteria	Alteromonadales	Pseudoalteromonadaceae	Pseudoalteromonas	0.805	1278
	140915	Pseudoalteromonas undina (T); NCIMB 2128T; X82140	Bacteria	Proteobacteria	Gammaproteobacteria	Alteromonadales	Pseudoalteromonadaceae	Pseudoalteromonas	0.723	1278
	140920	Pseudoalteromonas undina (T); NCIMB 2128T; X82140	Bacteria	Proteobacteria	Gammaproteobacteria	Alteromonadales	Pseudoalteromonadaceae	Pseudoalteromonas	0.845	1278
	140921	Pseudoalteromonas undina (T); NCIMB 2128T; X82140	Bacteria	Proteobacteria	Gammaproteobacteria	Alteromonadales	Pseudoalteromonadaceae	Pseudoalteromonas	0.762	1278
	140931	Pseudoalteromonas undina (T); NCIMB 2128T; X82140	Bacteria	Proteobacteria	Gammaproteobacteria	Alteromonadales	Pseudoalteromonadaceae	Pseudoalteromonas	0.782	1278
	140955	Pseudoalteromonas undina (T); NCIMB 2128T; X82140	Bacteria	Proteobacteria	Gammaproteobacteria	Alteromonadales	Pseudoalteromonadaceae	Pseudoalteromonas	0.9	1278
	140967	Pseudoalteromonas undina (T); NCIMB 2128T; X82140	Bacteria	Proteobacteria	Gammaproteobacteria	Alteromonadales	Pseudoalteromonadaceae	Pseudoalteromonas	0.79	1278
	140981	Pseudoalteromonas undina (T); NCIMB 2128T; X82140	Bacteria	Proteobacteria	Gammaproteobacteria	Alteromonadales	Pseudoalteromonadaceae	Pseudoalteromonas	0.815	1278
	145002	Pseudoalteromonas aurantia (T); ATCC 33046T; X82135	Bacteria	Proteobacteria	Gammaproteobacteria	Alteromonadales	Pseudoalteromonadaceae	Pseudoalteromonas	0.801	1349
	153173	Pseudoalteromonas undina (T); NCIMB 2128T; X82140	Bacteria	Proteobacteria	Gammaproteobacteria	Alteromonadales	Pseudoalteromonadaceae	Pseudoalteromonas	0.728	1278
	156459	Pseudoalteromonas undina (T); NCIMB 2128T; X82140	Bacteria	Proteobacteria	Gammaproteobacteria	Alteromonadales	Pseudoalteromonadaceae	Pseudoalteromonas	0.782	1278
	158140	Pseudoalteromonas undina (T); NCIMB 2128T; X82140	Bacteria	Proteobacteria	Gammaproteobacteria	Alteromonadales	Pseudoalteromonadaceae	Pseudoalteromonas	0.841	1278
	158267	Pseudoalteromonas aurantia (T); ATCC 33046T; X82135	Bacteria	Proteobacteria	Gammaproteobacteria	Alteromonadales	Pseudoalteromonadaceae	Pseudoalteromonas	0.813	1349
	160246	Vibrio vulnificus (T); ATCC 27562 T; X76333	Bacteria	Proteobacteria	Gammaproteobacteria	Vibrionales	Vibrionaceae	Vibrio	0.88	1438
	161179	Pseudoalteromonas undina (T); NCIMB 2128T; X82140	Bacteria	Proteobacteria	Gammaproteobacteria	Alteromonadales	Pseudoalteromonadaceae	Pseudoalteromonas	0.817	1278
	162751	Vibrio vulnificus (T); ATCC 27562 T; X76333	Bacteria	Proteobacteria	Gammaproteobacteria	Vibrionales	Vibrionaceae	Vibrio	0.833	1438
	165795	Vibrio vulnificus (T); ATCC 27562 T; X76333	Bacteria	Proteobacteria	Gammaproteobacteria	Vibrionales	Vibrionaceae	Vibrio	0.769	1438
	169030	Vibrio vulnificus (T); ATCC 27562 T; X76333	Bacteria	Proteobacteria	Gammaproteobacteria	Vibrionales	Vibrionaceae	Vibrio	0.767	1438
	176420	Vibrio navarrensis (T); X74715	Bacteria	Proteobacteria	Gammaproteobacteria	Vibrionales	Vibrionaceae	Vibrio	0.803	1252
	200856	Pseudoalteromonas undina (T); NCIMB 2128T; X82140	Bacteria	Proteobacteria	Gammaproteobacteria	Alteromonadales	Pseudoalteromonadaceae	Pseudoalteromonas	0.826	1278
	202760	Pseudoalteromonas espejiana (T); NCIMB 2127T; X82143	Bacteria	Proteobacteria	Gammaproteobacteria	Alteromonadales	Pseudoalteromonadaceae	Pseudoalteromonas	0.76	1332
	217623	Vibrio nereis (T); ATCC 25917T; X74716	Bacteria	Proteobacteria	Gammaproteobacteria	Vibrionales	Vibrionaceae	Vibrio	0.877	1307
	227555	Vibrio vulnificus (T); ATCC 27562 T; X76333	Bacteria	Proteobacteria	Gammaproteobacteria	Vibrionales	Vibrionaceae	Vibrio	0.691	1438
	227872	Vibrio natriegens (T); ATCC 14048T; X74714	Bacteria	Proteobacteria	Gammaproteobacteria	Vibrionales	Vibrionaceae	Vibrio	0.726	1368
	228084	Vibrio natriegens (T); ATCC 14048T; X74714	Bacteria	Proteobacteria	Gammaproteobacteria	Vibrionales	Vibrionaceae	Vibrio	0.801	1368
	228157	Vibrio natriegens (T); ATCC 14048T; X74714	Bacteria	Proteobacteria	Gammaproteobacteria	Vibrionales	Vibrionaceae	Vibrio	0.875	1368
	228879	Vibrio natriegens (T); ATCC 14048T; X74714	Bacteria	Proteobacteria	Gammaproteobacteria	Vibrionales	Vibrionaceae	Vibrio	0.7	1368
	228974	Pseudoalteromonas undina (T); NCIMB 2128T; X82140	Bacteria	Proteobacteria	Gammaproteobacteria	Alteromonadales	Pseudoalteromonadaceae	Pseudoalteromonas	0.708	1278
	229081	Vibrio agarivorans (T); 289T, CECT 5085T; AJ310647	Bacteria	Proteobacteria	Gammaproteobacteria	Vibrionales	Vibrionaceae	Vibrio	0.672	1449
	229982	Vibrio natriegens (T); ATCC 14048T; X74714	Bacteria	Proteobacteria	Gammaproteobacteria	Vibrionales	Vibrionaceae	Vibrio	0.664	1368
	230384	Vibrio orientalis (T); ATCC 33934T; X74719	Bacteria	Proteobacteria	Gammaproteobacteria	Vibrionales	Vibrionaceae	Vibrio	0.643	1357
	230524	Vibrio vulnificus (T); ATCC 27562 T; X76333	Bacteria	Proteobacteria	Gammaproteobacteria	Vibrionales	Vibrionaceae	Vibrio	0.684	1438
	231374	Vibrio vulnificus (T); ATCC 27562 T; X76333	Bacteria	Proteobacteria	Gammaproteobacteria	Vibrionales	Vibrionaceae	Vibrio	0.739	1438
	231442	Pseudoalteromonas undina (T); NCIMB 2128T; X82140	Bacteria	Proteobacteria	Gammaproteobacteria	Alteromonadales	Pseudoalteromonadaceae	Pseudoalteromonas	0.782	1278
	231832	Pseudoalteromonas undina (T); NCIMB 2128T; X82140	Bacteria	Proteobacteria	Gammaproteobacteria	Alteromonadales	Pseudoalteromonadaceae	Pseudoalteromonas	0.738	1278
	233255	Pseudoalteromonas undina (T); NCIMB 2128T; X82140	Bacteria	Proteobacteria	Gammaproteobacteria	Alteromonadales	Pseudoalteromonadaceae	Pseudoalteromonas	0.807	1278
	233383	Vibrio natriegens (T); ATCC 14048T; X74714	Bacteria	Proteobacteria	Gammaproteobacteria	Vibrionales	Vibrionaceae	Vibrio	0.812	1368
	233454	Vibrio natriegens (T); ATCC 14048T; X74714	Bacteria	Proteobacteria	Gammaproteobacteria	Vibrionales	Vibrionaceae	Vibrio	0.784	1368
	234491	Vibrio natriegens (T); ATCC 14048T; X74714	Bacteria	Proteobacteria	Gammaproteobacteria	Vibrionales	Vibrionaceae	Vibrio	0.833	1368
	234551	Pseudoalteromonas undina (T); NCIMB 2128T; X82140	Bacteria	Proteobacteria	Gammaproteobacteria	Alteromonadales	Pseudoalteromonadaceae	Pseudoalteromonas	0.683	1278
	234709	Vibrio agarivorans (T); 289T, CECT 5085T; AJ310647	Bacteria	Proteobacteria	Gammaproteobacteria	Vibrionales	Vibrionaceae	Vibrio	0.682	1449
	235663	Pseudoalteromonas undina (T); NCIMB 2128T; X82140	Bacteria	Proteobacteria	Gammaproteobacteria	Alteromonadales	Pseudoalteromonadaceae	Pseudoalteromonas	0.842	1278
	239572	Pseudoalteromonas undina (T); NCIMB 2128T; X82140	Bacteria	Proteobacteria	Gammaproteobacteria	Alteromonadales	Pseudoalteromonadaceae	Pseudoalteromonas	0.815	1278
	242480	Pseudoalteromonas undina (T); NCIMB 2128T; X82140	Bacteria	Proteobacteria	Gammaproteobacteria	Alteromonadales	Pseudoalteromonadaceae	Pseudoalteromonas	0.799	1278
	245029	Vibrio natriegens (T); ATCC 14048T; X74714	Bacteria	Proteobacteria	Gammaproteobacteria	Vibrionales	Vibrionaceae	Vibrio	0.944	1368
	245598	Pseudoalteromonas undina (T); NCIMB 2128T; X82140	Bacteria	Proteobacteria	Gammaproteobacteria	Alteromonadales	Pseudoalteromonadaceae	Pseudoalteromonas	0.769	1278
	249895	Pseudoalteromonas undina (T); NCIMB 2128T; X82140	Bacteria	Proteobacteria	Gammaproteobacteria	Alteromonadales	Pseudoalteromonadaceae	Pseudoalteromonas	0.868	1278
	251914	Pseudoalteromonas undina (T); NCIMB 2128T; X82140	Bacteria	Proteobacteria	Gammaproteobacteria	Alteromonadales	Pseudoalteromonadaceae	Pseudoalteromonas	0.86	1278
	253428	Pseudoalteromonas undina (T); NCIMB 2128T; X82140	Bacteria	Proteobacteria	Gammaproteobacteria	Alteromonadales	Pseudoalteromonadaceae	Pseudoalteromonas	0.754	1278
	261920	Pseudoalteromonas espejiana (T); NCIMB 2127T; X82143	Bacteria	Proteobacteria	Gammaproteobacteria	Alteromonadales	Pseudoalteromonadaceae	Pseudoalteromonas	0.812	1332
	275521	Pseudoalteromonas espejiana (T); NCIMB 2127T; X82143	Bacteria	Proteobacteria	Gammaproteobacteria	Alteromonadales	Pseudoalteromonadaceae	Pseudoalteromonas	0.746	1332
	276493	Vibrio tubiashii (T); ATCC 19109T; X74725	Bacteria	Proteobacteria	Gammaproteobacteria	Vibrionales	Vibrionaceae	Vibrio	0.806	1303
	309143	Pseudoalteromonas undina (T); NCIMB 2128T; X82140	Bacteria	Proteobacteria	Gammaproteobacteria	Alteromonadales	Pseudoalteromonadaceae	Pseudoalteromonas	0.649	1278
	309489	Pseudoalteromonas undina (T); NCIMB 2128T; X82140	Bacteria	Proteobacteria	Gammaproteobacteria	Alteromonadales	Pseudoalteromonadaceae	Pseudoalteromonas	0.861	1278
	339560	Vibrio vulnificus (T); ATCC 27562 T; X76333	Bacteria	Proteobacteria	Gammaproteobacteria	Vibrionales	Vibrionaceae	Vibrio	0.766	1438
	346476	Pseudoalteromonas undina (T); NCIMB 2128T; X82140	Bacteria	Proteobacteria	Gammaproteobacteria	Alteromonadales	Pseudoalteromonadaceae	Pseudoalteromonas	0.887	1278
	419752	Pseudoalteromonas undina (T); NCIMB 2128T; X82140	Bacteria	Proteobacteria	Gammaproteobacteria	Alteromonadales	Pseudoalteromonadaceae	Pseudoalteromonas	0.761	1278
	519520	Pseudoalteromonas luteoviolacea (T); NCIMB 1893T; X82144	Bacteria	Proteobacteria	Gammaproteobacteria	Alteromonadales	Pseudoalteromonadaceae	Pseudoalteromonas	0.75	1356
	526534	Pseudoalteromonas aurantia (T); ATCC 33046T; X82135	Bacteria	Proteobacteria	Gammaproteobacteria	Alteromonadales	Pseudoalteromonadaceae	Pseudoalteromonas	0.908	1349
	532994	Pseudoalteromonas atlantica (T); IAM 12927T; X82134	Bacteria	Proteobacteria	Gammaproteobacteria	Alteromonadales	Pseudoalteromonadaceae	Pseudoalteromonas	0.821	1346
	538892	Vibrio tubiashii (T); ATCC 19109T; X74725	Bacteria	Proteobacteria	Gammaproteobacteria	Vibrionales	Vibrionaceae	Vibrio	0.787	1303
	540617	Pseudoalteromonas undina (T); NCIMB 2128T; X82140	Bacteria	Proteobacteria	Gammaproteobacteria	Alteromonadales	Pseudoalteromonadaceae	Pseudoalteromonas	0.905	1278
	542710	Pseudoalteromonas antarctica (T); CECT 4664; NF3; X98336	Bacteria	Proteobacteria	Gammaproteobacteria	Alteromonadales	Pseudoalteromonadaceae	Pseudoalteromonas	0.797	1445
	555829	Pseudoalteromonas espejiana (T); NCIMB 2127T; X82143	Bacteria	Proteobacteria	Gammaproteobacteria	Alteromonadales	Pseudoalteromonadaceae	Pseudoalteromonas	0.753	1332
	561165	Pseudoalteromonas espejiana (T); NCIMB 2127T; X82143	Bacteria	Proteobacteria	Gammaproteobacteria	Alteromonadales	Pseudoalteromonadaceae	Pseudoalteromonas	0.657	1332
	561543	Pseudoalteromonas undina (T); NCIMB 2128T; X82140	Bacteria	Proteobacteria	Gammaproteobacteria	Alteromonadales	Pseudoalteromonadaceae	Pseudoalteromonas	0.731	1278
	562023	Pseudoalteromonas undina (T); NCIMB 2128T; X82140	Bacteria	Proteobacteria	Gammaproteobacteria	Alteromonadales	Pseudoalteromonadaceae	Pseudoalteromonas	0.862	1278
	563900	Vibrio agarivorans (T); 289T, CECT 5085T; AJ310647	Bacteria	Proteobacteria	Gammaproteobacteria	Vibrionales	Vibrionaceae	Vibrio	0.847	1449
	575667	Pseudoalteromonas aurantia (T); ATCC 33046T; X82135	Bacteria	Proteobacteria	Gammaproteobacteria	Alteromonadales	Pseudoalteromonadaceae	Pseudoalteromonas	0.716	1349
	578606	Vibrio vulnificus (T); ATCC 27562 T; X76333	Bacteria	Proteobacteria	Gammaproteobacteria	Vibrionales	Vibrionaceae	Vibrio	0.736	1438
	585394	Pseudoalteromonas undina (T); NCIMB 2128T; X82140	Bacteria	Proteobacteria	Gammaproteobacteria	Alteromonadales	Pseudoalteromonadaceae	Pseudoalteromonas	0.801	1278
	586483	Pseudoalteromonas undina (T); NCIMB 2128T; X82140	Bacteria	Proteobacteria	Gammaproteobacteria	Alteromonadales	Pseudoalteromonadaceae	Pseudoalteromonas	0.703	1278
	586746	Pseudoalteromonas aurantia (T); ATCC 33046T; X82135	Bacteria	Proteobacteria	Gammaproteobacteria	Alteromonadales	Pseudoalteromonadaceae	Pseudoalteromonas	0.763	1349
	591923	Pseudoalteromonas undina (T); NCIMB 2128T; X82140	Bacteria	Proteobacteria	Gammaproteobacteria	Alteromonadales	Pseudoalteromonadaceae	Pseudoalteromonas	0.834	1278
	707147	Pseudoalteromonas undina (T); NCIMB 2128T; X82140	Bacteria	Proteobacteria	Gammaproteobacteria	Alteromonadales	Pseudoalteromonadaceae	Pseudoalteromonas	0.75	1278
	721199	Pseudoalteromonas espejiana (T); NCIMB 2127T; X82143	Bacteria	Proteobacteria	Gammaproteobacteria	Alteromonadales	Pseudoalteromonadaceae	Pseudoalteromonas	0.826	1332
	746138	Pseudoalteromonas aurantia (T); ATCC 33046T; X82135	Bacteria	Proteobacteria	Gammaproteobacteria	Alteromonadales	Pseudoalteromonadaceae	Pseudoalteromonas	0.594	1349
	789777	Pseudoalteromonas undina (T); NCIMB 2128T; X82140	Bacteria	Proteobacteria	Gammaproteobacteria	Alteromonadales	Pseudoalteromonadaceae	Pseudoalteromonas	0.863	1278
	797357	Amphritea japonica (T); JAMM 1866; AB330881	Bacteria	Proteobacteria	Gammaproteobacteria	Oceanospirillales	Oceanospirillaceae	Amphritea	0.669	1366
	808031	Pseudoalteromonas espejiana (T); NCIMB 2127T; X82143	Bacteria	Proteobacteria	Gammaproteobacteria	Alteromonadales	Pseudoalteromonadaceae	Pseudoalteromonas	0.841	1332
	820978	Vibrio vulnificus (T); ATCC 27562 T; X76333	Bacteria	Proteobacteria	Gammaproteobacteria	Vibrionales	Vibrionaceae	Vibrio	0.877	1438
	827726	Pseudoalteromonas undina (T); NCIMB 2128T; X82140	Bacteria	Proteobacteria	Gammaproteobacteria	Alteromonadales	Pseudoalteromonadaceae	Pseudoalteromonas	0.758	1278
	830290	Pseudoalteromonas undina (T); NCIMB 2128T; X82140	Bacteria	Proteobacteria	Gammaproteobacteria	Alteromonadales	Pseudoalteromonadaceae	Pseudoalteromonas	0.874	1278
	830696	Pseudoalteromonas undina (T); NCIMB 2128T; X82140	Bacteria	Proteobacteria	Gammaproteobacteria	Alteromonadales	Pseudoalteromonadaceae	Pseudoalteromonas	0.827	1278
	833778	Vibrio mimicus (T); ATCC 33653T; X74713	Bacteria	Proteobacteria	Gammaproteobacteria	Vibrionales	Vibrionaceae	Vibrio	0.911	1350
	834063	Pseudoalteromonas undina (T); NCIMB 2128T; X82140	Bacteria	Proteobacteria	Gammaproteobacteria	Alteromonadales	Pseudoalteromonadaceae	Pseudoalteromonas	0.856	1278
	834767	Pseudoalteromonas undina (T); NCIMB 2128T; X82140	Bacteria	Proteobacteria	Gammaproteobacteria	Alteromonadales	Pseudoalteromonadaceae	Pseudoalteromonas	0.812	1278
	836362	Pseudoalteromonas undina (T); NCIMB 2128T; X82140	Bacteria	Proteobacteria	Gammaproteobacteria	Alteromonadales	Pseudoalteromonadaceae	Pseudoalteromonas	0.707	1278
	836450	Pseudoalteromonas espejiana (T); NCIMB 2127T; X82143	Bacteria	Proteobacteria	Gammaproteobacteria	Alteromonadales	Pseudoalteromonadaceae	Pseudoalteromonas	0.867	1332
	837313	Vibrio mimicus (T); ATCC 33653T; X74713	Bacteria	Proteobacteria	Gammaproteobacteria	Vibrionales	Vibrionaceae	Vibrio	0.886	1350
	837781	Pseudoalteromonas undina (T); NCIMB 2128T; X82140	Bacteria	Proteobacteria	Gammaproteobacteria	Alteromonadales	Pseudoalteromonadaceae	Pseudoalteromonas	0.827	1278
	838851	Vibrio mimicus (T); ATCC 33653T; X74713	Bacteria	Proteobacteria	Gammaproteobacteria	Vibrionales	Vibrionaceae	Vibrio	0.87	1350
	935060	Pseudoalteromonas undina (T); NCIMB 2128T; X82140	Bacteria	Proteobacteria	Gammaproteobacteria	Alteromonadales	Pseudoalteromonadaceae	Pseudoalteromonas	0.792	1278
	1055734	Pseudoalteromonas undina (T); NCIMB 2128T; X82140	Bacteria	Proteobacteria	Gammaproteobacteria	Alteromonadales	Pseudoalteromonadaceae	Pseudoalteromonas	0.768	1278
	1105883	Pseudoalteromonas undina (T); NCIMB 2128T; X82140	Bacteria	Proteobacteria	Gammaproteobacteria	Alteromonadales	Pseudoalteromonadaceae	Pseudoalteromonas	0.854	1278
	1106577	Pseudoalteromonas undina (T); NCIMB 2128T; X82140	Bacteria	Proteobacteria	Gammaproteobacteria	Alteromonadales	Pseudoalteromonadaceae	Pseudoalteromonas	0.786	1278
	1107917	Vibrio vulnificus (T); ATCC 27562 T; X76333	Bacteria	Proteobacteria	Gammaproteobacteria	Vibrionales	Vibrionaceae	Vibrio	0.663	1438
	1108701	Pseudoalteromonas undina (T); NCIMB 2128T; X82140	Bacteria	Proteobacteria	Gammaproteobacteria	Alteromonadales	Pseudoalteromonadaceae	Pseudoalteromonas	0.813	1278
	1115975	Vibrio vulnificus (T); ATCC 27562 T; X76333	Bacteria	Proteobacteria	Gammaproteobacteria	Vibrionales	Vibrionaceae	Vibrio	0.906	1438
	1142684	Pseudoalteromonas espejiana (T); NCIMB 2127T; X82143	Bacteria	Proteobacteria	Gammaproteobacteria	Alteromonadales	Pseudoalteromonadaceae	Pseudoalteromonas	0.84	1332
	1145551	Pseudoalteromonas undina (T); NCIMB 2128T; X82140	Bacteria	Proteobacteria	Gammaproteobacteria	Alteromonadales	Pseudoalteromonadaceae	Pseudoalteromonas	0.849	1278
	1146540	Pseudoalteromonas espejiana (T); NCIMB 2127T; X82143	Bacteria	Proteobacteria	Gammaproteobacteria	Alteromonadales	Pseudoalteromonadaceae	Pseudoalteromonas	0.839	1332
	1931738	Pseudoalteromonas espejiana (T); NCIMB 2127T; X82143	Bacteria	Proteobacteria	Gammaproteobacteria	Alteromonadales	Pseudoalteromonadaceae	Pseudoalteromonas	0.833	1332
	1931739	Pseudoalteromonas espejiana (T); NCIMB 2127T; X82143	Bacteria	Proteobacteria	Gammaproteobacteria	Alteromonadales	Pseudoalteromonadaceae	Pseudoalteromonas	0.748	1332
	2000912	Vibrio vulnificus (T); ATCC 27562 T; X76333	Bacteria	Proteobacteria	Gammaproteobacteria	Vibrionales	Vibrionaceae	Vibrio	0.92	1438
	2046416	Pseudoalteromonas undina (T); NCIMB 2128T; X82140	Bacteria	Proteobacteria	Gammaproteobacteria	Alteromonadales	Pseudoalteromonadaceae	Pseudoalteromonas	0.84	1278
	2373263	Vibrio nereis (T); ATCC 25917T; X74716	Bacteria	Proteobacteria	Gammaproteobacteria	Vibrionales	Vibrionaceae	Vibrio	0.842	1307
	4270835	Vibrio mimicus (T); ATCC 33653T; X74713	Bacteria	Proteobacteria	Gammaproteobacteria	Vibrionales	Vibrionaceae	Vibrio	0.957	1350
	4302975	Pseudoalteromonas espejiana (T); NCIMB 2127T; X82143	Bacteria	Proteobacteria	Gammaproteobacteria	Alteromonadales	Pseudoalteromonadaceae	Pseudoalteromonas	0.832	1332
	4313148	Pseudoalteromonas espejiana (T); NCIMB 2127T; X82143	Bacteria	Proteobacteria	Gammaproteobacteria	Alteromonadales	Pseudoalteromonadaceae	Pseudoalteromonas	0.802	1332
	4315215	Pseudoalteromonas espejiana (T); NCIMB 2127T; X82143	Bacteria	Proteobacteria	Gammaproteobacteria	Alteromonadales	Pseudoalteromonadaceae	Pseudoalteromonas	0.761	1332
	4320372	Pseudoalteromonas undina (T); NCIMB 2128T; X82140	Bacteria	Proteobacteria	Gammaproteobacteria	Alteromonadales	Pseudoalteromonadaceae	Pseudoalteromonas	0.796	1278
	4353625	Pseudoalteromonas mariniglutinosa (T); KMM 3635; AJ507251	Bacteria	Proteobacteria	Gammaproteobacteria	Alteromonadales	Pseudoalteromonadaceae	Pseudoalteromonas	0.77	1400
	4356978	Pseudoalteromonas undina (T); NCIMB 2128T; X82140	Bacteria	Proteobacteria	Gammaproteobacteria	Alteromonadales	Pseudoalteromonadaceae	Pseudoalteromonas	0.846	1278
	4378322	Pseudoalteromonas luteoviolacea (T); NCIMB 1893T; X82144	Bacteria	Proteobacteria	Gammaproteobacteria	Alteromonadales	Pseudoalteromonadaceae	Pseudoalteromonas	0.772	1356
	4393352	Vibrio mimicus (T); ATCC 33653T; X74713	Bacteria	Proteobacteria	Gammaproteobacteria	Vibrionales	Vibrionaceae	Vibrio	0.852	1350
	4393354	Vibrio natriegens (T); ATCC 14048T; X74714	Bacteria	Proteobacteria	Gammaproteobacteria	Vibrionales	Vibrionaceae	Vibrio	0.838	1368
	4400016	Pseudoalteromonas undina (T); NCIMB 2128T; X82140	Bacteria	Proteobacteria	Gammaproteobacteria	Alteromonadales	Pseudoalteromonadaceae	Pseudoalteromonas	0.812	1278
	4406967	Pseudoalteromonas undina (T); NCIMB 2128T; X82140	Bacteria	Proteobacteria	Gammaproteobacteria	Alteromonadales	Pseudoalteromonadaceae	Pseudoalteromonas	0.93	1278
	4406968	Pseudoalteromonas undina (T); NCIMB 2128T; X82140	Bacteria	Proteobacteria	Gammaproteobacteria	Alteromonadales	Pseudoalteromonadaceae	Pseudoalteromonas	0.916	1278
	4407222	Pseudoalteromonas aurantia (T); ATCC 33046T; X82135	Bacteria	Proteobacteria	Gammaproteobacteria	Alteromonadales	Pseudoalteromonadaceae	Pseudoalteromonas	0.852	1349
	4419665	Pseudoalteromonas undina (T); NCIMB 2128T; X82140	Bacteria	Proteobacteria	Gammaproteobacteria	Alteromonadales	Pseudoalteromonadaceae	Pseudoalteromonas	0.847	1278
	4430475	Pseudoalteromonas espejiana (T); NCIMB 2127T; X82143	Bacteria	Proteobacteria	Gammaproteobacteria	Alteromonadales	Pseudoalteromonadaceae	Pseudoalteromonas	0.867	1332
	4441573	Pseudoalteromonas undina (T); NCIMB 2128T; X82140	Bacteria	Proteobacteria	Gammaproteobacteria	Alteromonadales	Pseudoalteromonadaceae	Pseudoalteromonas	0.826	1278
	4451971	Vibrio mimicus (T); ATCC 33653T; X74713	Bacteria	Proteobacteria	Gammaproteobacteria	Vibrionales	Vibrionaceae	Vibrio	0.862	1350
	4480124	Pseudoalteromonas undina (T); NCIMB 2128T; X82140	Bacteria	Proteobacteria	Gammaproteobacteria	Alteromonadales	Pseudoalteromonadaceae	Pseudoalteromonas	0.678	1278
*Color indicates agreement between NCBI, RDP, and SILVA
	Vibrionaceae
	Pseudoalteromonadaceae
	Ambiguous

## Sheet: SILVA_RAW
	SILVA_Results
*	Greengenes ID	Taxonomy SILVA	Sequence_Score	bp_score	cutoff_head	cutoff_tail	identity	quality	startpos	stoppos	ecolipos	bps	gene_bps	turn
	8906	Bacteria;Proteobacteria;Gammaproteobacteria;Alteromonadales;Pseudoalteromonadaceae;Pseudoalteromonas;	0	114	0	0	100	100	1010	43102	11	1469	1469	none
	8958	Bacteria;Proteobacteria;Gammaproteobacteria;Alteromonadales;Pseudoalteromonadaceae;Pseudoalteromonas;	0.962921	108	0	0	95.5446	96	1047	42636	30	1418	1418	none
	8965	Bacteria;Proteobacteria;Gammaproteobacteria;Alteromonadales;Pseudoalteromonadaceae;Pseudoalteromonas;	0	104	0	0	100	100	1095	42986	47	1403	1403	none
	8966	Bacteria;Proteobacteria;Gammaproteobacteria;Alteromonadales;Pseudoalteromonadaceae;Pseudoalteromonas;	0.994485	107	0	0	99.6431	99	1047	42611	30	1400	1400	none
	9314	Bacteria;Proteobacteria;Gammaproteobacteria;Vibrionales;Vibrionaceae;Vibrio;	0.999173	111	7	0	100	99	999	43019	1	1462	1462	none
	19398	Bacteria;Proteobacteria;Gammaproteobacteria;Alteromonadales;Pseudoalteromonadaceae;Pseudoalteromonas;	0	116	0	0	100	100	1043	43258	28	1490	1490	none
	21967	Bacteria;Proteobacteria;Gammaproteobacteria;Vibrionales;Vibrionaceae;Vibrio;	0.95904	116	2	0	98.0435	95	1004	41565	5	1400	1400	none
	36441	Bacteria;Proteobacteria;Gammaproteobacteria;Alteromonadales;Pseudoalteromonadaceae;Pseudoalteromonas;	0	108	0	0	100	100	1055	43030	33	1433	1433	none
	36812	Bacteria;Proteobacteria;Gammaproteobacteria;Alteromonadales;Pseudoalteromonadaceae;Pseudoalteromonas;	0.964541	117	0	0	98.1595	96	1012	43229	12	1498	1498	none
	40554	Bacteria;Proteobacteria;Gammaproteobacteria;Alteromonadales;Pseudoalteromonadaceae;Pseudoalteromonas;	0	117	0	0	100	100	1006	43238	7	1497	1497	none
	43095	Bacteria;Proteobacteria;Gammaproteobacteria;Alteromonadales;Pseudoalteromonadaceae;Pseudoalteromonas;	0.90462	102	0	0	93.8017	90	1047	43057	30	1450	1450	none
	73464	Bacteria;Proteobacteria;Gammaproteobacteria;Alteromonadales;Pseudoalteromonadaceae;Pseudoalteromonas;	0	108	0	0	100	100	1795	43258	107	1411	1411	none
	79171	Bacteria;Proteobacteria;Gammaproteobacteria;Alteromonadales;Pseudoalteromonadaceae;Pseudoalteromonas;	0.966087	110	0	0	97.5818	96	1059	43052	35	1435	1435	none
	83123	Bacteria;Proteobacteria;Gammaproteobacteria;Alteromonadales;Pseudoalteromonadaceae;Pseudoalteromonas;	0.984221	101	0	0	98.9067	98	1171	43020	75	1385	1385	none
	84384	Bacteria;Proteobacteria;Gammaproteobacteria;Alteromonadales;Pseudoalteromonadaceae;Pseudoalteromonas;	0.8949	114	0	0	95.6682	89	1055	43238	33	1476	1476	none
	84701	Bacteria;Proteobacteria;Gammaproteobacteria;Alteromonadales;Pseudoalteromonadaceae;Pseudoalteromonas;	0	116	0	0	100	100	1043	43245	28	1482	1482	none
	91378	Bacteria;Proteobacteria;Gammaproteobacteria;Vibrionales;Vibrionaceae;Vibrio;	0.989655	103	0	0	96.7311	98	1768	42615	97	1345	1345	none
	91529	Bacteria;Proteobacteria;Gammaproteobacteria;Vibrionales;Vibrionaceae;Vibrio;	0.915424	101	0	0	94.0565	91	1771	42589	98	1342	1342	none
	100142	Bacteria;Proteobacteria;Gammaproteobacteria;Alteromonadales;Pseudoalteromonadaceae;Pseudoalteromonas;	0.997878	104	0	13	99.9235	99	3133	43282	163	1374	1373	none
	100722	Bacteria;Proteobacteria;Gammaproteobacteria;Vibrionales;Vibrionaceae;Vibrio;	0.958755	100	0	0	96.9972	95	1119	42987	56	1431	1431	none
	107552	Bacteria;Proteobacteria;Gammaproteobacteria;Alteromonadales;Pseudoalteromonadaceae;Pseudoalteromonas;	0	115	0	0	100	100	1066	43241	38	1474	1474	none
	108405	Bacteria;Proteobacteria;Gammaproteobacteria;Vibrionales;Vibrionaceae;Vibrio;	0.974249	113	0	0	98.8992	97	1119	43219	56	1457	1457	none
	112879	Bacteria;Proteobacteria;Gammaproteobacteria;Alteromonadales;Pseudoalteromonadaceae;Pseudoalteromonas;	0.957915	104	0	0	96.6878	95	1203	43215	76	1418	1418	none
	134668	Bacteria;Proteobacteria;Gammaproteobacteria;Alteromonadales;Pseudoalteromonadaceae;Pseudoalteromonas;	0.993192	112	0	0	99.1846	99	1106	42547	50	1348	1348	none
	136178	Bacteria;Proteobacteria;Gammaproteobacteria;Vibrionales;Vibrionaceae;Vibrio;	0	119	0	0	100	100	1006	42547	7	1411	1411	none
	140774	Bacteria;Proteobacteria;Gammaproteobacteria;Alteromonadales;Pseudoalteromonadaceae;Pseudoalteromonas;	0.949705	113	0	0	95.6126	94	1006	43235	7	1486	1486	none
	140783	Bacteria;Proteobacteria;Gammaproteobacteria;Alteromonadales;Pseudoalteromonadaceae;Pseudoalteromonas;	0.945922	111	0	0	96.8927	94	1006	43235	7	1479	1479	none
	140786	Bacteria;Proteobacteria;Gammaproteobacteria;Alteromonadales;Pseudoalteromonadaceae;Pseudoalteromonas;	0.973128	111	0	0	98.3629	97	1078	43235	43	1465	1465	none
	140787	Bacteria;Proteobacteria;Gammaproteobacteria;Alteromonadales;Pseudoalteromonadaceae;Pseudoalteromonas;	0.940598	113	0	0	97.597	94	1006	43235	7	1494	1494	none
	140803	Bacteria;Proteobacteria;Gammaproteobacteria;Alteromonadales;Pseudoalteromonadaceae;Pseudoalteromonas;	0.950009	116	0	0	97.9184	95	1006	43235	7	1483	1483	none
	140823	Bacteria;Proteobacteria;Gammaproteobacteria;Alteromonadales;Pseudoalteromonadaceae;Pseudoalteromonas;	0.970094	114	0	0	99.5379	97	1006	43235	7	1496	1496	none
	140829	Bacteria;Proteobacteria;Gammaproteobacteria;Alteromonadales;Pseudoalteromonadaceae;Pseudoalteromonas;	0.974473	115	0	0	97.3378	97	1006	43235	7	1491	1491	none
	140837	Bacteria;Proteobacteria;Gammaproteobacteria;Alteromonadales;Pseudoalteromonadaceae;Pseudoalteromonas;	0.912813	111	0	0	93.7913	91	1006	43235	7	1508	1508	none
	140838	Bacteria;Proteobacteria;Gammaproteobacteria;Alteromonadales;Pseudoalteromonadaceae;Pseudoalteromonas;	0.932234	118	0	0	97.0218	93	1006	43235	7	1536	1536	none
	140854	Bacteria;Proteobacteria;Gammaproteobacteria;Alteromonadales;Pseudoalteromonadaceae;Pseudoalteromonas;	0.946212	113	0	0	97.235	94	1006	43235	7	1497	1497	none
	140860	Bacteria;Proteobacteria;Gammaproteobacteria;Alteromonadales;Pseudoalteromonadaceae;Pseudoalteromonas;	0.978022	116	0	0	98.6425	97	1006	43235	7	1496	1496	none
	140870	Bacteria;Proteobacteria;Gammaproteobacteria;Alteromonadales;Pseudoalteromonadaceae;Pseudoalteromonas;	0.962411	115	0	0	97.7819	96	1006	43235	7	1490	1490	none
	140875	Bacteria;Proteobacteria;Gammaproteobacteria;Alteromonadales;Pseudoalteromonadaceae;Pseudoalteromonas;	0.965976	117	0	0	98.4288	96	1006	43235	7	1498	1498	none
	140912	Bacteria;Proteobacteria;Gammaproteobacteria;Alteromonadales;Pseudoalteromonadaceae;Pseudoalteromonas;	0.935014	113	0	0	97.8802	93	1006	43235	7	1500	1500	none
	140915	Bacteria;Proteobacteria;Gammaproteobacteria;Alteromonadales;Pseudoalteromonadaceae;Pseudoalteromonas;	0.880712	112	0	0	92.0304	88	1006	43235	7	1536	1536	none
	140920	Bacteria;Proteobacteria;Gammaproteobacteria;Alteromonadales;Pseudoalteromonadaceae;Pseudoalteromonas;	0.961313	115	0	0	99.445	96	1006	43235	7	1496	1496	none
	140921	Bacteria;Proteobacteria;Gammaproteobacteria;Alteromonadales;Pseudoalteromonadaceae;Pseudoalteromonas;	0.938229	112	0	0	95.2381	93	1006	43235	7	1490	1490	none
	140931	Bacteria;Proteobacteria;Gammaproteobacteria;Alteromonadales;Pseudoalteromonadaceae;Pseudoalteromonas;	0.938062	118	0	0	97.01	93	1006	43235	7	1530	1530	none
	140955	Bacteria;Proteobacteria;Gammaproteobacteria;Alteromonadales;Pseudoalteromonadaceae;Pseudoalteromonas;	0.976877	117	0	0	98.6487	97	1006	43235	7	1500	1500	none
	140967	Bacteria;Proteobacteria;Gammaproteobacteria;Alteromonadales;Pseudoalteromonadaceae;Pseudoalteromonas;	0.974979	116	0	0	98.2318	97	1006	43235	7	1499	1499	none
	140981	Bacteria;Proteobacteria;Gammaproteobacteria;Alteromonadales;Pseudoalteromonadaceae;Pseudoalteromonas;	0.9483	119	0	0	97.676	94	1006	43235	7	1531	1531	none
	145002	Bacteria;Proteobacteria;Gammaproteobacteria;Alteromonadales;Pseudoalteromonadaceae;Pseudoalteromonas;	0.969887	116	0	0	95.0433	96	1043	43245	28	1489	1489	none
	153173	Unclassified;	0.920055	117	0	20	93.8959	92	1007	43280	8	1540	1540	none
	156459	Bacteria;Proteobacteria;Gammaproteobacteria;Alteromonadales;Pseudoalteromonadaceae;Pseudoalteromonas;	0.998735	120	4	13	99.7837	99	1002	43282	3	1539	1538	none
	158140	Bacteria;Proteobacteria;Gammaproteobacteria;Alteromonadales;Pseudoalteromonadaceae;Pseudoalteromonas;	0.963233	104	0	0	97.6608	96	1075	43030	42	1427	1427	none
	158267	Bacteria;Proteobacteria;Gammaproteobacteria;Alteromonadales;Pseudoalteromonadaceae;Pseudoalteromonas;	0.974119	106	0	0	95.9431	97	1121	43006	57	1403	1403	none
	160246	Bacteria;Proteobacteria;Gammaproteobacteria;Vibrionales;Vibrionaceae;Vibrio;	0.989011	116	0	0	99.4905	98	1013	41776	13	1385	1385	none
	161179	Bacteria;Proteobacteria;Gammaproteobacteria;Alteromonadales;Pseudoalteromonadaceae;Pseudoalteromonas;	0.956356	104	0	0	96.4764	95	1100	43030	48	1416	1416	none
	162751	Bacteria;Proteobacteria;Gammaproteobacteria;Vibrionales;Vibrionaceae;Vibrio;	0.947902	109	0	0	96.431	94	1041	43057	26	1455	1455	none
	165795	Bacteria;Proteobacteria;Gammaproteobacteria;Vibrionales;Vibrionaceae;Vibrio;	0.947037	99	0	0	96.1373	94	1203	43025	76	1395	1395	none
	169030	Bacteria;Proteobacteria;Gammaproteobacteria;Vibrionales;Vibrionaceae;Vibrio;	0.944113	96	0	0	95.9913	94	1203	42623	76	1365	1365	none
	176420	Bacteria;Proteobacteria;Gammaproteobacteria;Vibrionales;Vibrionaceae;Vibrio;	0.948696	117	0	0	97.1596	94	1006	43235	7	1514	1514	none
	200856	Bacteria;Proteobacteria;Gammaproteobacteria;Alteromonadales;Pseudoalteromonadaceae;Pseudoalteromonas;	0.97205	119	0	15	96.5447	97	1007	43284	8	1496	1493	none
	202760	Bacteria;Proteobacteria;Gammaproteobacteria;Alteromonadales;Pseudoalteromonadaceae;Pseudoalteromonas;	0.948312	108	0	0	93.5527	94	1007	43241	8	1417	1417	none
	217623	Bacteria;Proteobacteria;Gammaproteobacteria;Vibrionales;Vibrionaceae;	0.980637	118	0	0	98.7805	98	1006	43238	7	1517	1517	none
	227555	Unclassified;	0.874794	97	0	0	92.6986	87	1783	43011	101	1396	1396	none
	227872	Unclassified;	0.890601	95	0	0	92.2068	89	1775	43025	100	1336	1336	none
	228084	Bacteria;Proteobacteria;Gammaproteobacteria;Vibrionales;Vibrionaceae;Vibrio;	0.92092	100	0	0	95.8425	92	1775	42623	100	1370	1370	none
	228157	Bacteria;Proteobacteria;Gammaproteobacteria;Vibrionales;Vibrionaceae;Vibrio;	0.958008	103	0	0	97.9623	95	1768	43020	97	1385	1385	none
	228879	Bacteria;Proteobacteria;Gammaproteobacteria;Vibrionales;Vibrionaceae;Vibrio;	0.84797	102	0	0	93.2118	84	1131	43020	60	1477	1477	none
	228974	Bacteria;Proteobacteria;Gammaproteobacteria;Alteromonadales;Pseudoalteromonadaceae;Pseudoalteromonas;	0.895711	95	0	0	93.4229	89	1131	43006	60	1408	1408	none
	229081	Bacteria;Proteobacteria;Gammaproteobacteria;Vibrionales;Vibrionaceae;Vibrio;	0.890211	100	0	0	93.6639	89	1106	43025	50	1428	1428	none
	229982	Unclassified;	0.817617	93	0	0	89.3183	81	1768	43020	97	1419	1419	none
	230384	Bacteria;Proteobacteria;Gammaproteobacteria;Vibrionales;Vibrionaceae;Vibrio;	0.838941	100	0	0	91.1864	83	1131	43011	60	1469	1469	none
	230524	Unclassified;	0.892378	95	0	0	91.875	89	1768	43011	97	1372	1372	none
	231374	Bacteria;Proteobacteria;Gammaproteobacteria;Vibrionales;Vibrionaceae;Vibrio;	0.899799	100	0	0	95.0401	89	1783	43020	101	1398	1398	none
	231442	Bacteria;Proteobacteria;Gammaproteobacteria;Alteromonadales;Pseudoalteromonadaceae;Pseudoalteromonas;	0.90659	103	0	0	94.4598	90	1106	43020	50	1440	1440	none
	231832	Bacteria;Proteobacteria;Gammaproteobacteria;Alteromonadales;Pseudoalteromonadaceae;Pseudoalteromonas;	0.934009	103	0	0	96.7628	93	1138	43020	63	1420	1420	none
	233255	Bacteria;Proteobacteria;Gammaproteobacteria;Alteromonadales;Pseudoalteromonadaceae;Pseudoalteromonas;	0.954835	103	0	0	97.238	95	1142	43030	64	1408	1408	none
	233383	Bacteria;Proteobacteria;Gammaproteobacteria;Vibrionales;Vibrionaceae;Vibrio;	0.947496	101	0	0	96.9208	94	1131	43025	60	1425	1425	none
	233454	Bacteria;Proteobacteria;Gammaproteobacteria;Vibrionales;Vibrionaceae;Vibrio;	0.920836	103	0	0	95.7212	92	1131	43020	60	1444	1444	none
	234491	Bacteria;Proteobacteria;Gammaproteobacteria;Vibrionales;Vibrionaceae;Vibrio;	0.948175	103	0	0	97.0118	94	1131	43025	60	1436	1436	none
	234551	Bacteria;Proteobacteria;Gammaproteobacteria;Alteromonadales;Pseudoalteromonadaceae;Pseudoalteromonas;	0.89479	102	0	0	94.456	89	1131	43020	60	1440	1440	none
	234709	Bacteria;Proteobacteria;Gammaproteobacteria;Vibrionales;Vibrionaceae;Vibrio;	0.878811	97	0	0	93.1818	87	1768	43011	97	1407	1407	none
	235663	Bacteria;Proteobacteria;Gammaproteobacteria;Alteromonadales;Pseudoalteromonadaceae;Pseudoalteromonas;	0.982842	112	0	0	98.6178	98	1055	43112	33	1449	1449	none
	239572	Bacteria;Proteobacteria;Gammaproteobacteria;Alteromonadales;Pseudoalteromonadaceae;Pseudoalteromonas;	0.935526	107	0	0	95.4258	93	1043	42636	28	1412	1412	none
	242480	Bacteria;Proteobacteria;Gammaproteobacteria;Alteromonadales;Pseudoalteromonadaceae;Pseudoalteromonas;	0.968508	118	0	0	97.274	96	1006	43241	7	1505	1505	none
	245029	Bacteria;Proteobacteria;Gammaproteobacteria;Vibrionales;Vibrionaceae;Vibrio;	0.996859	105	0	0	99.7893	99	1102	43006	49	1422	1422	none
	245598	Bacteria;Proteobacteria;Gammaproteobacteria;Alteromonadales;Pseudoalteromonadaceae;Pseudoalteromonas;	0.918072	103	0	0	95.7756	91	1084	43020	46	1443	1443	none
	249895	Bacteria;Proteobacteria;Gammaproteobacteria;Alteromonadales;Pseudoalteromonadaceae;Pseudoalteromonas;	0.969409	115	0	0	98.0809	96	1006	43241	7	1501	1501	none
	251914	Bacteria;Proteobacteria;Gammaproteobacteria;Alteromonadales;Pseudoalteromonadaceae;Pseudoalteromonas;	0.965249	107	0	0	97.8412	96	1082	43030	45	1434	1434	none
	253428	Bacteria;Proteobacteria;Gammaproteobacteria;Alteromonadales;Pseudoalteromonadaceae;Pseudoalteromonas;	0.910217	108	0	0	93.2891	91	1043	42636	28	1423	1423	none
	261920	Bacteria;Proteobacteria;Gammaproteobacteria;Alteromonadales;Pseudoalteromonadaceae;Pseudoalteromonas;	0.979882	106	0	0	98.5714	97	1131	43006	60	1399	1399	none
	275521	Bacteria;Proteobacteria;Gammaproteobacteria;Alteromonadales;Pseudoalteromonadaceae;Pseudoalteromonas;	0.956412	107	0	0	94.0746	95	1119	43020	56	1411	1411	none
	276493	Bacteria;Proteobacteria;Gammaproteobacteria;Vibrionales;Vibrionaceae;Vibrio;	0.959925	117	0	0	98.1803	95	1034	43115	23	1479	1479	none
	309143	Bacteria;Proteobacteria;Gammaproteobacteria;Alteromonadales;Pseudoalteromonadaceae;Pseudoalteromonas;	0.913832	113	0	0	94.657	91	1006	43235	7	1516	1516	none
	309489	Bacteria;Proteobacteria;Gammaproteobacteria;Alteromonadales;Pseudoalteromonadaceae;Pseudoalteromonas;	0.997601	118	0	0	99.4012	99	1006	43241	7	1505	1505	none
	339560	Bacteria;Proteobacteria;Gammaproteobacteria;Vibrionales;Vibrionaceae;Vibrio;	0.94674	117	0	0	94.382	94	1047	43159	30	1464	1464	none
	346476	Bacteria;Proteobacteria;Gammaproteobacteria;Alteromonadales;Pseudoalteromonadaceae;Pseudoalteromonas;	0.983782	118	0	0	97.479	98	1006	43187	7	1477	1477	none
	419752	Bacteria;Proteobacteria;Gammaproteobacteria;Alteromonadales;Pseudoalteromonadaceae;Pseudoalteromonas;	0.978456	111	0	0	98.0515	97	1073	43055	41	1436	1436	none
	519520	Bacteria;Proteobacteria;Gammaproteobacteria;Vibrionales;Vibrionaceae;Catenococcus;	0.924766	99	0	0	95.4927	92	1212	43006	81	1383	1383	none
	526534	Bacteria;Proteobacteria;Gammaproteobacteria;Alteromonadales;Pseudoalteromonadaceae;Pseudoalteromonas;	0.992083	110	0	0	96.7306	99	1035	42625	23	1417	1417	none
	532994	Bacteria;Proteobacteria;Gammaproteobacteria;Alteromonadales;Pseudoalteromonadaceae;Pseudoalteromonas;	0.990554	118	0	0	98.9247	99	1026	42532	18	1372	1372	none
	538892	Bacteria;Proteobacteria;Gammaproteobacteria;Vibrionales;Vibrionaceae;Vibrio;	0.943981	118	0	0	95.7488	94	1006	43235	7	1511	1511	none
	540617	Bacteria;Proteobacteria;Gammaproteobacteria;Alteromonadales;Pseudoalteromonadaceae;Pseudoalteromonas;	0.984746	115	0	0	98.8253	98	1006	43057	7	1465	1465	none
	542710	Bacteria;Proteobacteria;Gammaproteobacteria;Alteromonadales;Pseudoalteromonadaceae;Pseudoalteromonas;	0.954283	119	0	0	96.3415	95	1006	42532	7	1400	1400	none
	555829	Bacteria;Proteobacteria;Gammaproteobacteria;Alteromonadales;Pseudoalteromonadaceae;Pseudoalteromonas;	0.945241	102	0	0	95.6803	94	1131	42634	60	1386	1386	none
	561165	Unclassified;	0.873835	100	0	0	90.8124	87	1131	42989	60	1394	1394	none
	561543	Bacteria;Proteobacteria;Gammaproteobacteria;Alteromonadales;Pseudoalteromonadaceae;Pseudoalteromonas;	0.905246	111	0	0	92.2705	90	1043	43096	28	1455	1455	none
	562023	Bacteria;Proteobacteria;Gammaproteobacteria;Alteromonadales;Pseudoalteromonadaceae;Pseudoalteromonas;	0.949242	116	0	0	97.6699	94	1006	43235	7	1499	1499	none
	563900	Bacteria;Proteobacteria;Gammaproteobacteria;Vibrionales;Vibrionaceae;Vibrio;	0.954171	117	1	0	96.6236	95	1005	42530	6	1408	1408	none
	575667	Bacteria;Proteobacteria;Gammaproteobacteria;Alteromonadales;Pseudoalteromonadaceae;Pseudoalteromonas;	0.942547	102	0	0	95.1764	94	1131	42636	60	1388	1388	none
	578606	Bacteria;Proteobacteria;Gammaproteobacteria;Vibrionales;Vibrionaceae;Vibrio;	0.917553	119	0	0	93.4476	91	1006	43229	7	1495	1495	none
	585394	Bacteria;Proteobacteria;Gammaproteobacteria;Alteromonadales;Pseudoalteromonadaceae;Pseudoalteromonas;	0.944056	103	0	0	95.3045	94	1131	42987	60	1396	1396	none
	586483	Bacteria;Proteobacteria;Gammaproteobacteria;Alteromonadales;Pseudoalteromonadaceae;Pseudoalteromonas;	0.984759	103	0	0	92.3466	98	1131	42638	60	1384	1384	none
	586746	Bacteria;Proteobacteria;Gammaproteobacteria;Alteromonadales;Pseudoalteromonadaceae;Pseudoalteromonas;	0.967368	117	0	0	94.3465	96	1032	43186	22	1477	1477	none
	591923	Bacteria;Proteobacteria;Gammaproteobacteria;Alteromonadales;Pseudoalteromonadaceae;Pseudoalteromonas;	0.95287	104	0	0	98.9524	95	1131	43006	60	1394	1394	none
	707147	Bacteria;Proteobacteria;Gammaproteobacteria;Alteromonadales;Pseudoalteromonadaceae;Pseudoalteromonas;	0.928493	115	0	0	96.4113	92	1006	43238	7	1514	1514	none
	721199	Bacteria;Proteobacteria;Gammaproteobacteria;Alteromonadales;Pseudoalteromonadaceae;Pseudoalteromonas;	0.986749	119	0	0	99.2685	98	1040	42526	26	1367	1367	none
	746138	Bacteria;Proteobacteria;Gammaproteobacteria;Alteromonadales;Pseudoalteromonadaceae;Pseudoalteromonas;	0.963201	113	9	0	90.7613	96	997	41529	1	1369	1367	none
	789777	Bacteria;Proteobacteria;Gammaproteobacteria;Alteromonadales;Pseudoalteromonadaceae;Pseudoalteromonas;	0.957758	117	0	0	99.2195	95	1006	43238	7	1496	1496	none
	797357	Bacteria;Proteobacteria;Gammaproteobacteria;Vibrionales;Vibrionaceae;Vibrio;	0.897337	114	0	0	91.6866	89	1006	43241	7	1504	1504	none
	808031	Bacteria;Proteobacteria;Gammaproteobacteria;Alteromonadales;Pseudoalteromonadaceae;Pseudoalteromonas;	0.987	102	0	0	98.0392	98	1768	42589	97	1326	1326	none
	820978	Bacteria;Proteobacteria;Gammaproteobacteria;Vibrionales;Vibrionaceae;Vibrio;	0.987956	104	0	0	96.9562	98	1768	42589	97	1346	1346	none
	827726	Bacteria;Proteobacteria;Gammaproteobacteria;Alteromonadales;Pseudoalteromonadaceae;Pseudoalteromonas;	0.924813	116	0	0	93.6735	92	1006	43235	7	1499	1499	none
	830290	Bacteria;Proteobacteria;Gammaproteobacteria;Alteromonadales;Pseudoalteromonadaceae;Pseudoalteromonas;	0.96025	117	0	0	99.7225	96	1006	43235	7	1497	1497	none
	830696	Bacteria;Proteobacteria;Gammaproteobacteria;Alteromonadales;Pseudoalteromonadaceae;Pseudoalteromonas;	0.93508	117	0	0	96.6085	93	1006	43235	7	1499	1499	none
	833778	Bacteria;Proteobacteria;Gammaproteobacteria;Vibrionales;Vibrionaceae;Vibrio;	0.972282	116	1	0	98.2782	97	1005	43235	6	1509	1509	none
	834063	Bacteria;Proteobacteria;Gammaproteobacteria;Alteromonadales;Pseudoalteromonadaceae;Pseudoalteromonas;	0.960206	118	0	0	99.63	96	1006	43235	7	1497	1497	none
	834767	Bacteria;Proteobacteria;Gammaproteobacteria;Alteromonadales;Pseudoalteromonadaceae;Pseudoalteromonas;	0.940371	118	0	0	95.8133	94	1006	43235	7	1496	1496	none
	836362	Bacteria;Proteobacteria;Gammaproteobacteria;Alteromonadales;Pseudoalteromonadaceae;Pseudoalteromonas;	0.855229	115	0	0	91.4914	85	1006	43235	7	1520	1520	none
	836450	Bacteria;Proteobacteria;Gammaproteobacteria;Alteromonadales;Pseudoalteromonadaceae;Pseudoalteromonas;	0.999062	100	0	0	99.4173	99	1146	42636	67	1373	1373	none
	837313	Bacteria;Proteobacteria;Gammaproteobacteria;Vibrionales;Vibrionaceae;Vibrio;	0.966613	118	1	0	96.8987	96	1005	43235	6	1508	1508	none
	837781	Bacteria;Proteobacteria;Gammaproteobacteria;Alteromonadales;Pseudoalteromonadaceae;Pseudoalteromonas;	0.952761	118	0	0	96.6323	95	1006	43235	7	1497	1497	none
	838851	Bacteria;Proteobacteria;Gammaproteobacteria;Vibrionales;Vibrionaceae;Vibrio;	0.969146	118	1	0	96.5211	96	1005	43235	6	1506	1506	none
	935060	Bacteria;Proteobacteria;Gammaproteobacteria;Alteromonadales;Pseudoalteromonadaceae;Pseudoalteromonas;	0.958062	110	0	0	97.3239	95	1106	43216	50	1444	1444	none
	1055734	Bacteria;Proteobacteria;Gammaproteobacteria;Alteromonadales;Pseudoalteromonadaceae;Pseudoalteromonas;	0.967453	113	0	0	97.7679	96	1043	41787	28	1358	1358	none
	1105883	Bacteria;Proteobacteria;Gammaproteobacteria;Alteromonadales;Pseudoalteromonadaceae;Pseudoalteromonas;	0.983953	117	2	0	98.2924	98	1004	43235	5	1505	1505	none
	1106577	Bacteria;Proteobacteria;Gammaproteobacteria;Alteromonadales;Pseudoalteromonadaceae;Pseudoalteromonas;	0.959419	116	0	0	96.832	95	1006	43235	7	1503	1503	none
	1107917	Bacteria;Proteobacteria;Gammaproteobacteria;Vibrionales;Vibrionaceae;Vibrio;	0.908829	119	1	0	90.4693	90	1005	42540	6	1402	1402	none
	1108701	Bacteria;Proteobacteria;Gammaproteobacteria;Alteromonadales;Pseudoalteromonadaceae;Pseudoalteromonas;	0.983454	107	0	0	99.0014	98	1106	43020	50	1410	1410	none
	1115975	Bacteria;Proteobacteria;Gammaproteobacteria;Vibrionales;Vibrionaceae;Vibrio;	0.998189	120	0	0	99.5293	99	1010	43186	11	1487	1487	none
	1142684	Bacteria;Proteobacteria;Gammaproteobacteria;Alteromonadales;Pseudoalteromonadaceae;Pseudoalteromonas;	0.994057	108	0	0	99.572	99	1768	43223	97	1402	1402	none
	1145551	Bacteria;Proteobacteria;Gammaproteobacteria;Alteromonadales;Pseudoalteromonadaceae;Pseudoalteromonas;	0.954372	116	0	0	97.7716	95	1050	43235	31	1494	1494	none
	1146540	Bacteria;Proteobacteria;Gammaproteobacteria;Alteromonadales;Pseudoalteromonadaceae;Pseudoalteromonas;	0.968212	105	0	0	96.6339	96	1084	43006	46	1423	1423	none
	1931738	Bacteria;Proteobacteria;Gammaproteobacteria;Alteromonadales;Pseudoalteromonadaceae;Pseudoalteromonas;	0.982108	104	0	0	98.4496	98	1131	43057	60	1418	1418	none
	1931739	Bacteria;Proteobacteria;Gammaproteobacteria;Alteromonadales;Pseudoalteromonadaceae;Pseudoalteromonas;	0.963222	102	0	0	96.6619	96	1131	43020	60	1406	1406	none
	2000912	Bacteria;Proteobacteria;Gammaproteobacteria;Vibrionales;Vibrionaceae;Vibrio;	0.999229	118	0	0	99.3948	99	1043	43255	28	1495	1495	none
	2046416	Bacteria;Proteobacteria;Gammaproteobacteria;Alteromonadales;Pseudoalteromonadaceae;Pseudoalteromonas;	0.991891	115	0	0	97.7241	99	1055	43111	33	1450	1450	none
	2373263	Bacteria;Proteobacteria;Gammaproteobacteria;Vibrionales;Vibrionaceae;Vibrio;	0.981271	107	0	0	96.3768	98	1129	43030	59	1424	1424	none
	4270835	Bacteria;Proteobacteria;Gammaproteobacteria;Vibrionales;Vibrionaceae;Vibrio;	0.996829	121	9	12	98.7031	99	997	43283	1	1545	1541	none
	4302975	Bacteria;Proteobacteria;Gammaproteobacteria;Alteromonadales;Pseudoalteromonadaceae;Pseudoalteromonas;	0.986464	120	0	0	97.3561	98	1006	42528	7	1381	1381	none
	4313148	Bacteria;Proteobacteria;Gammaproteobacteria;Alteromonadales;Pseudoalteromonadaceae;Pseudoalteromonas;	0.985808	118	0	0	97.979	98	1011	42528	11	1377	1377	none
	4315215	Bacteria;Proteobacteria;Gammaproteobacteria;Alteromonadales;Pseudoalteromonadaceae;Pseudoalteromonas;	0.953184	112	0	0	95.8944	95	1084	42558	46	1364	1364	none
	4320372	Bacteria;Proteobacteria;Gammaproteobacteria;Alteromonadales;Pseudoalteromonadaceae;Pseudoalteromonas;	0.927163	114	2	12	96.7347	92	1004	43281	5	1532	1532	none
	4353625	Bacteria;Proteobacteria;Gammaproteobacteria;Alteromonadales;Pseudoalteromonadaceae;Pseudoalteromonas;	0.991076	110	0	0	94.6705	99	1084	42558	46	1375	1375	none
	4356978	Bacteria;Proteobacteria;Gammaproteobacteria;Alteromonadales;Pseudoalteromonadaceae;Pseudoalteromonas;	0.97089	116	0	0	98.8353	97	1006	43235	7	1498	1498	none
	4378322	Bacteria;Proteobacteria;Gammaproteobacteria;Alteromonadales;Pseudoalteromonadaceae;Pseudoalteromonas;	0.951618	109	0	0	97.9226	95	2041	43186	118	1394	1394	none
	4393352	Bacteria;Proteobacteria;Gammaproteobacteria;Vibrionales;Vibrionaceae;Vibrio;	0.932117	101	0	0	96.3727	93	1204	43025	76	1419	1419	none
	4393354	Bacteria;Proteobacteria;Gammaproteobacteria;Vibrionales;Vibrionaceae;Vibrio;	0.925835	98	0	0	98.2338	92	1084	42627	46	1382	1382	none
	4400016	Bacteria;Proteobacteria;Gammaproteobacteria;Alteromonadales;Pseudoalteromonadaceae;Pseudoalteromonas;	0.964097	118	0	0	97.6722	96	1006	43235	7	1501	1501	none
	4406967	Bacteria;Proteobacteria;Gammaproteobacteria;Alteromonadales;Pseudoalteromonadaceae;Pseudoalteromonas;	0.970541	116	0	0	99.7073	97	1012	43229	12	1498	1498	none
	4406968	Bacteria;Proteobacteria;Gammaproteobacteria;Alteromonadales;Pseudoalteromonadaceae;Pseudoalteromonas;	0.985407	118	0	0	99.4146	98	1013	43229	13	1488	1488	none
	4407222	Bacteria;Proteobacteria;Gammaproteobacteria;Alteromonadales;Pseudoalteromonadaceae;Pseudoalteromonas;	0.999261	118	0	0	98.152	99	1043	43115	28	1461	1461	none
	4419665	Bacteria;Proteobacteria;Gammaproteobacteria;Alteromonadales;Pseudoalteromonadaceae;Pseudoalteromonas;	0.972054	115	0	0	98.1066	97	1006	43235	7	1497	1497	none
	4430475	Bacteria;Proteobacteria;Gammaproteobacteria;Alteromonadales;Pseudoalteromonadaceae;Pseudoalteromonas;	0.976573	111	0	0	98.5816	97	1084	42558	46	1375	1375	none
	4441573	Bacteria;Proteobacteria;Gammaproteobacteria;Alteromonadales;Pseudoalteromonadaceae;Pseudoalteromonas;	0.974542	115	0	0	98.5863	97	1010	41542	11	1357	1357	none
	4451971	Bacteria;Proteobacteria;Gammaproteobacteria;Vibrionales;Vibrionaceae;Vibrio;	0.993619	117	0	0	95.8305	99	1043	43112	28	1463	1463	none
	4480124	Bacteria;Proteobacteria;Gammaproteobacteria;Alteromonadales;Pseudoalteromonadaceae;Pseudoalteromonas;	0.87383	115	0	0	92.1053	87	1006	43235	7	1508	1508	none
*Color indicates agreement between NCBI, RDP, and SILVA
	Vibrionaceae
	Pseudoalteromonadaceae
	Ambiguous
